# Supplementary material for: A novel stereoselective synthesis of N-heterocycles by intramolecular hydrovinylationElectronic supplementary information (ESI) available: 1H and 13C NMR spectra of compounds 1a–f, 2a–d, 3–5, 8–10. See http://www.rsc.org/suppdata/p1/b1/b108310d/
Source: Royal Society of Chemistry journal article supplement (doi:10.1039/b108310d), 2001-11-28

mjob09proton  
STANDARD 1H OBSERVE

Pulse sequence: s2pu1  
Date: Oct 6 2000  
Solvent: cdcl3  
Temp: 30.0 C / 303.1 K  
Sample #1  
File: 102  
Mercury-300 "nmr300"

PULSE SEQUENCE  
Relax. delay 1.000 sec  
Pulse 45.0 degrees  
Acq. time 5.461 sec  
Width 6000.0 Hz  
8 repetitions  
OBSERVE H1, 300.0575947 MHz  
DATA PROCESSING  
File size 88336  
Total time 1 minute

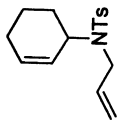

1a

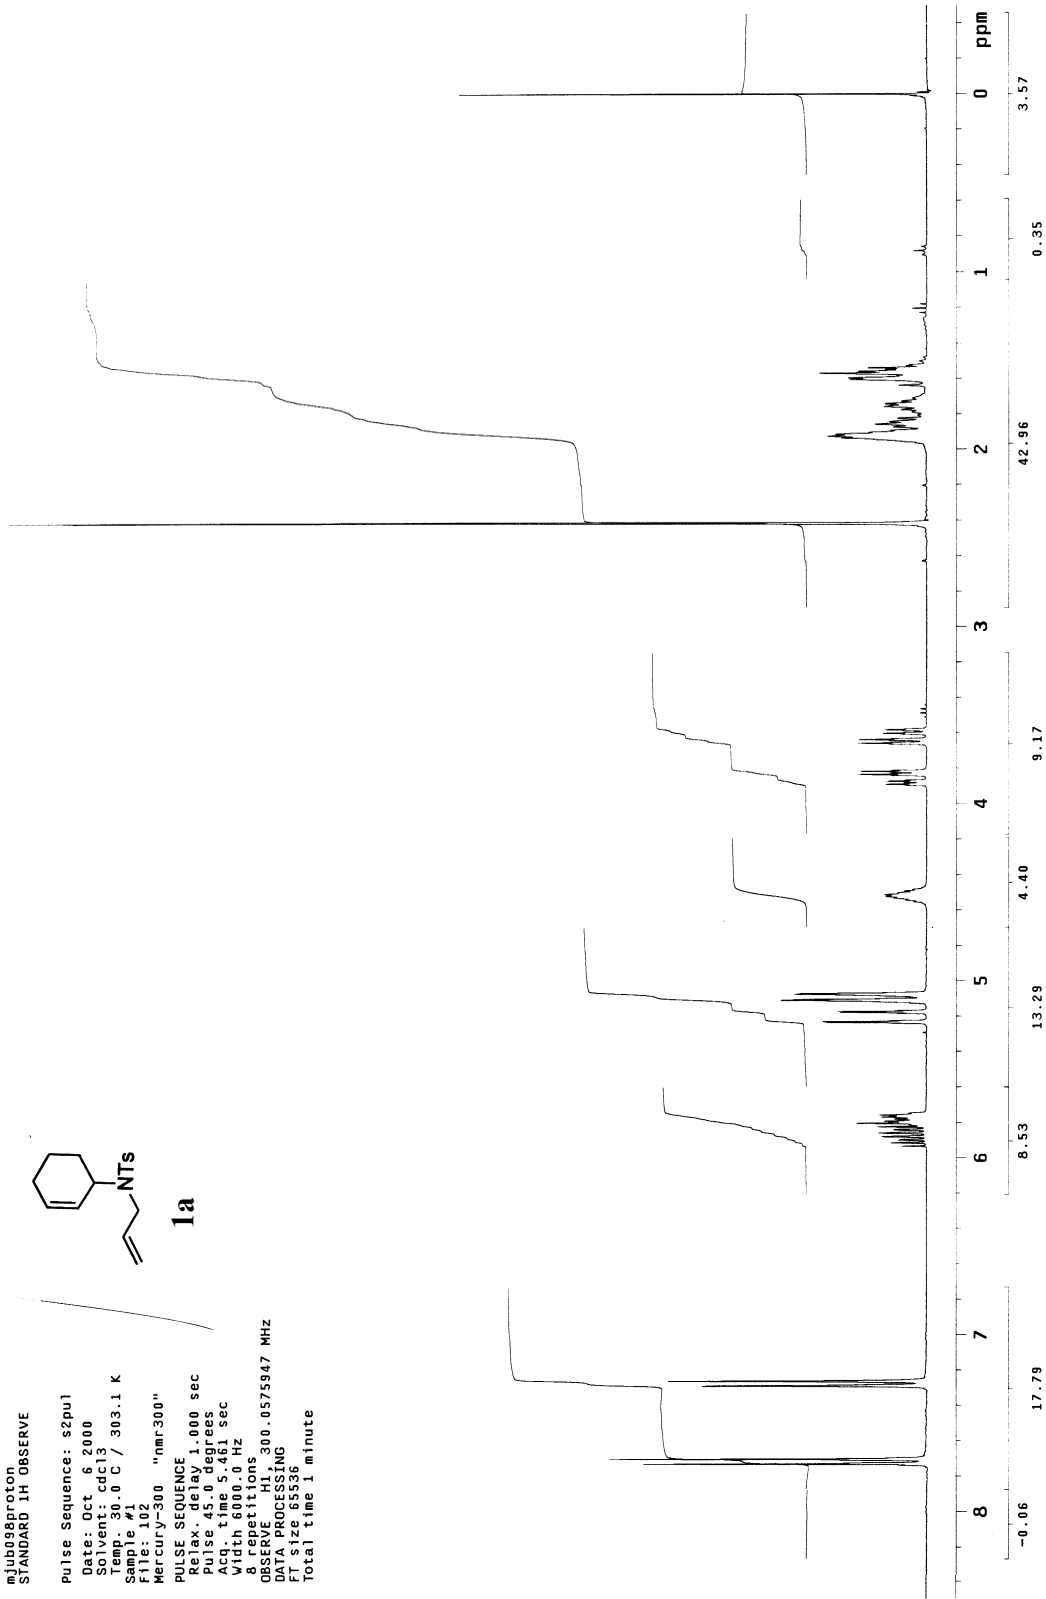

mjob088carbon  
13C OBSERVE

Pulse Sequence: s2pu1

Date: Oct 6 2000

Operator: jls

Temp: 30.0 C / 303.1 K

Sample #5

File: 502

Mercury-300 "nmr300"

PULSE SEQUENCE

Relax delay 1.000 sec

Pulse 45.0 degrees

Acq. time 1.815 sec

Width 17000.0 Hz

256 repetitions

OBSERVE C13, 75.4495244 MHz

DECOUPLE H1, 300.0590417 MHz

Power 39 dB

Channel 13 on

VALIDATED

DATA PROCESSING

Line broadening 1.0 Hz

FT size 65536

Total time 12 minutes

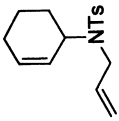

1a

129.813  
127.716  
127.324

132.632

136.772

138.559

143.187

116.734

77.725  
77.298  
76.872

55.665

46.747

29.102

24.688  
21.965

21.724

200 180 160 140 120 100 80 60 40 20 ppm

mju138chcorrelation  
STANDARD 1H OBSERVE

Pulse Sequence: s2pul  
Date: Dec 12 2000  
Solvent: cdCl3  
Temp: 30.0 C / 303.1 K  
Sample #16  
File: 1603  
Mercury-300 "nmr300"

PULSE SEQUENCE  
Relax. delay 1.000 sec  
Pulse 45.0 degrees  
Acq. time 5.461 sec  
Width 6000.0 Hz  
8 repetitions

OBSERVE H1, 300.0575941 MHz  
DATA PROCESSING  
F1 size 85336  
Total time 1 minute

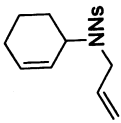

1b

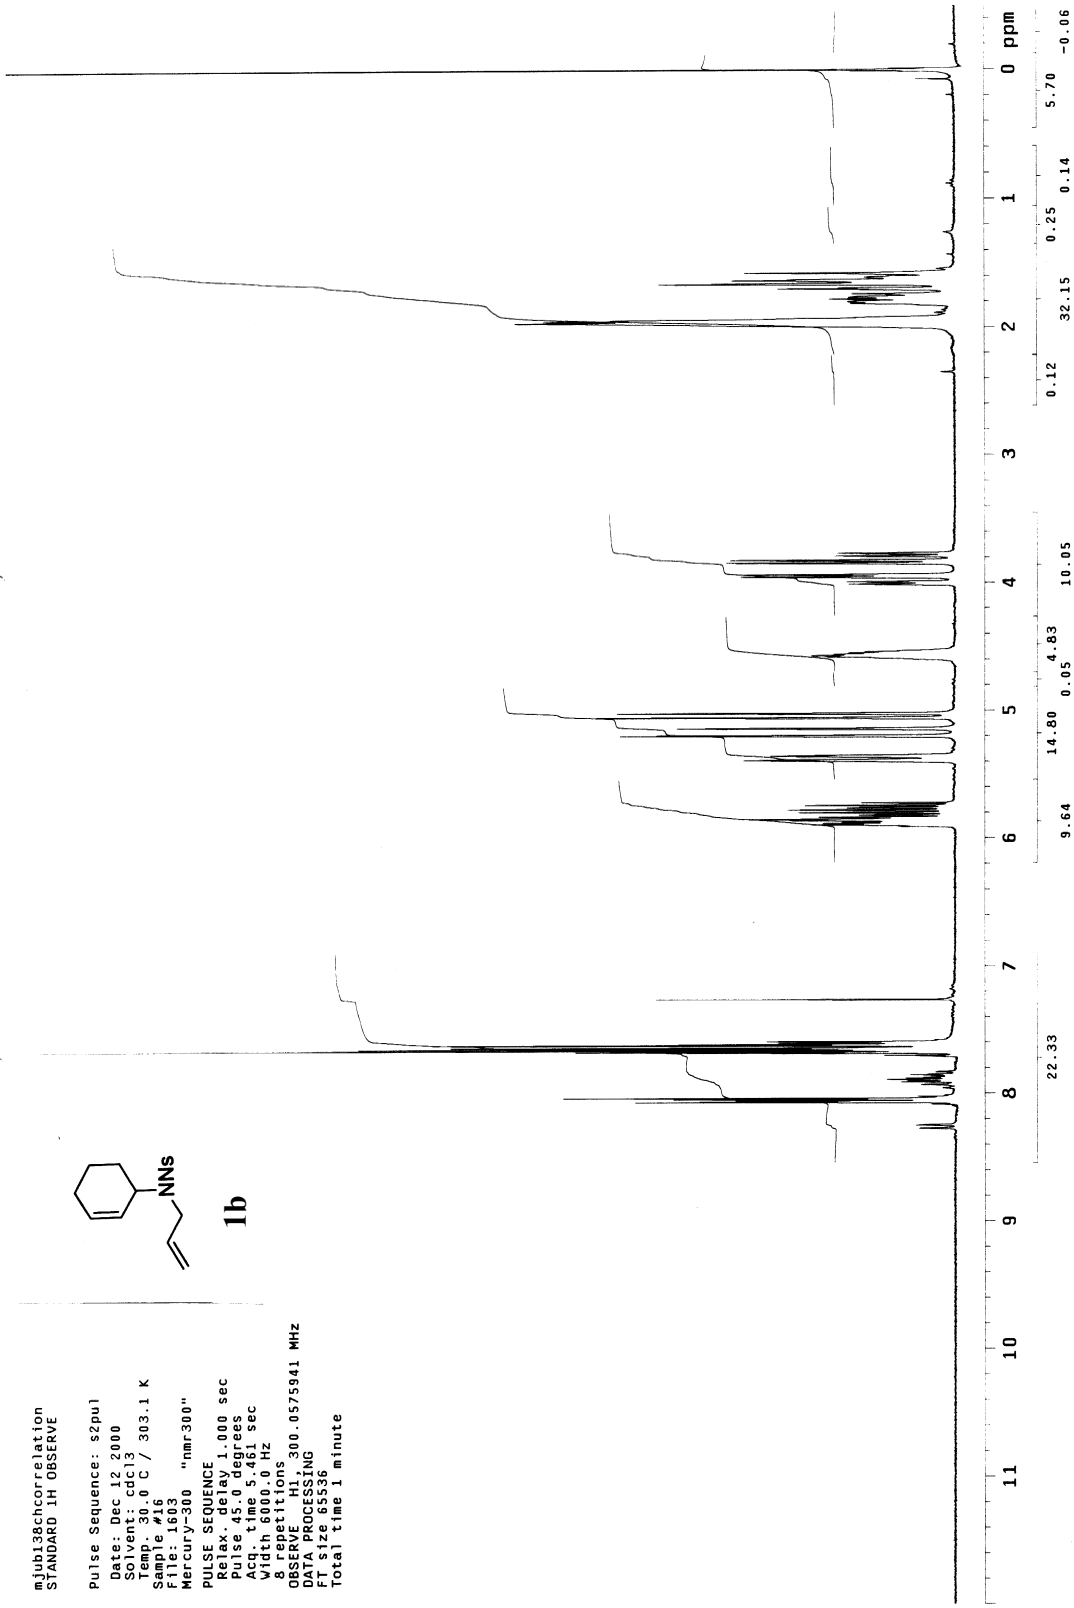

mjob18carbon  
13C OBSERVE

Pulse Sequence: s2pul  
Date: Dec 12 2000  
Solvent: cdCl3  
Temp: 30.0 C / 303.1 K  
Sample #16  
File: 1602  
Mercury-300 "nmr300"

PULSE SEQUENCE  
Relax. delay 1.000 sec  
Pulse 45.0 degrees  
Acq. time 1.815 sec  
Width 17000.0 Hz  
256 repetitions

OBSERVE C13, 75.4495427 MHz  
DECOUPLE H1, 300.0590417 MHz  
Power 39 dBV on  
Channel 13 on  
WALTZ-16 modulated  
DATA PROCESSING  
Line broadening 1.0 Hz  
FT size 65536  
Total time 12 minutes

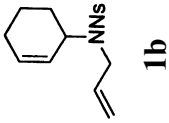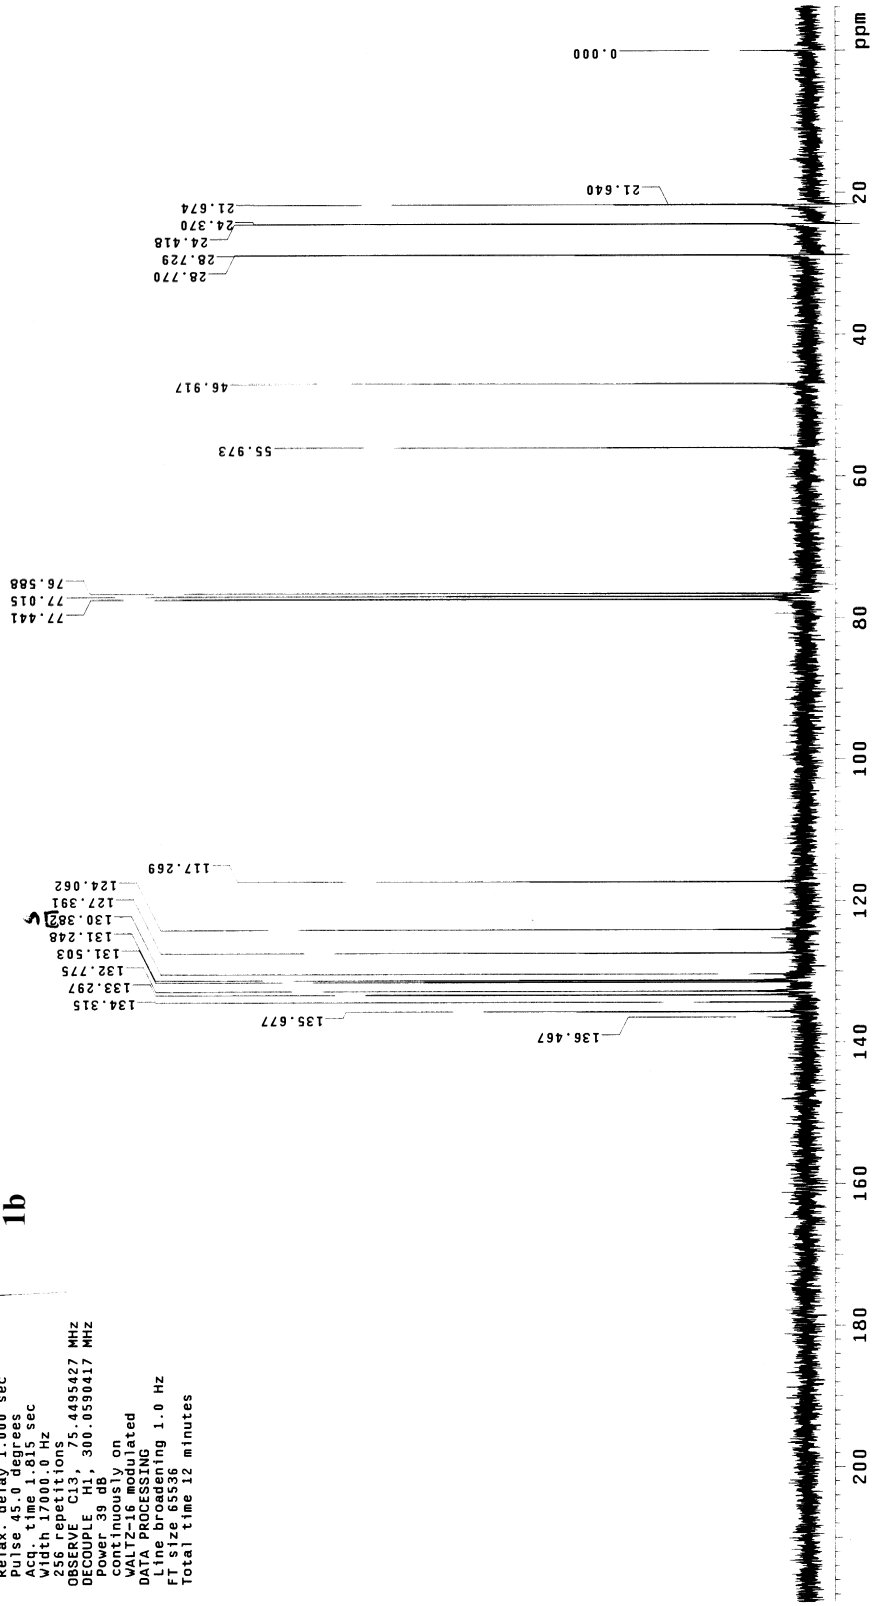

nJul164h  
STANDARD 1H OBSERVE

Pulse Sequence: s2pul  
Date: Feb 10 2001  
Solvent: cdcl3  
Temp: 30.0 C / 303.1 K  
Sample #15  
File: 1501  
Mercury-300 "nmr300"  
PULSE SEQUENCE  
Relax: delay 1.000 sec  
Pulse: 45.0 degrees  
Acq. time 5.461 sec  
Width 6000.0 Hz  
8 repetitions  
OBSERVE: HL, 300.0575945 MHz  
DATA PROCESSING  
File size 65336  
Total time 1 minute

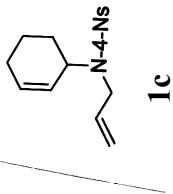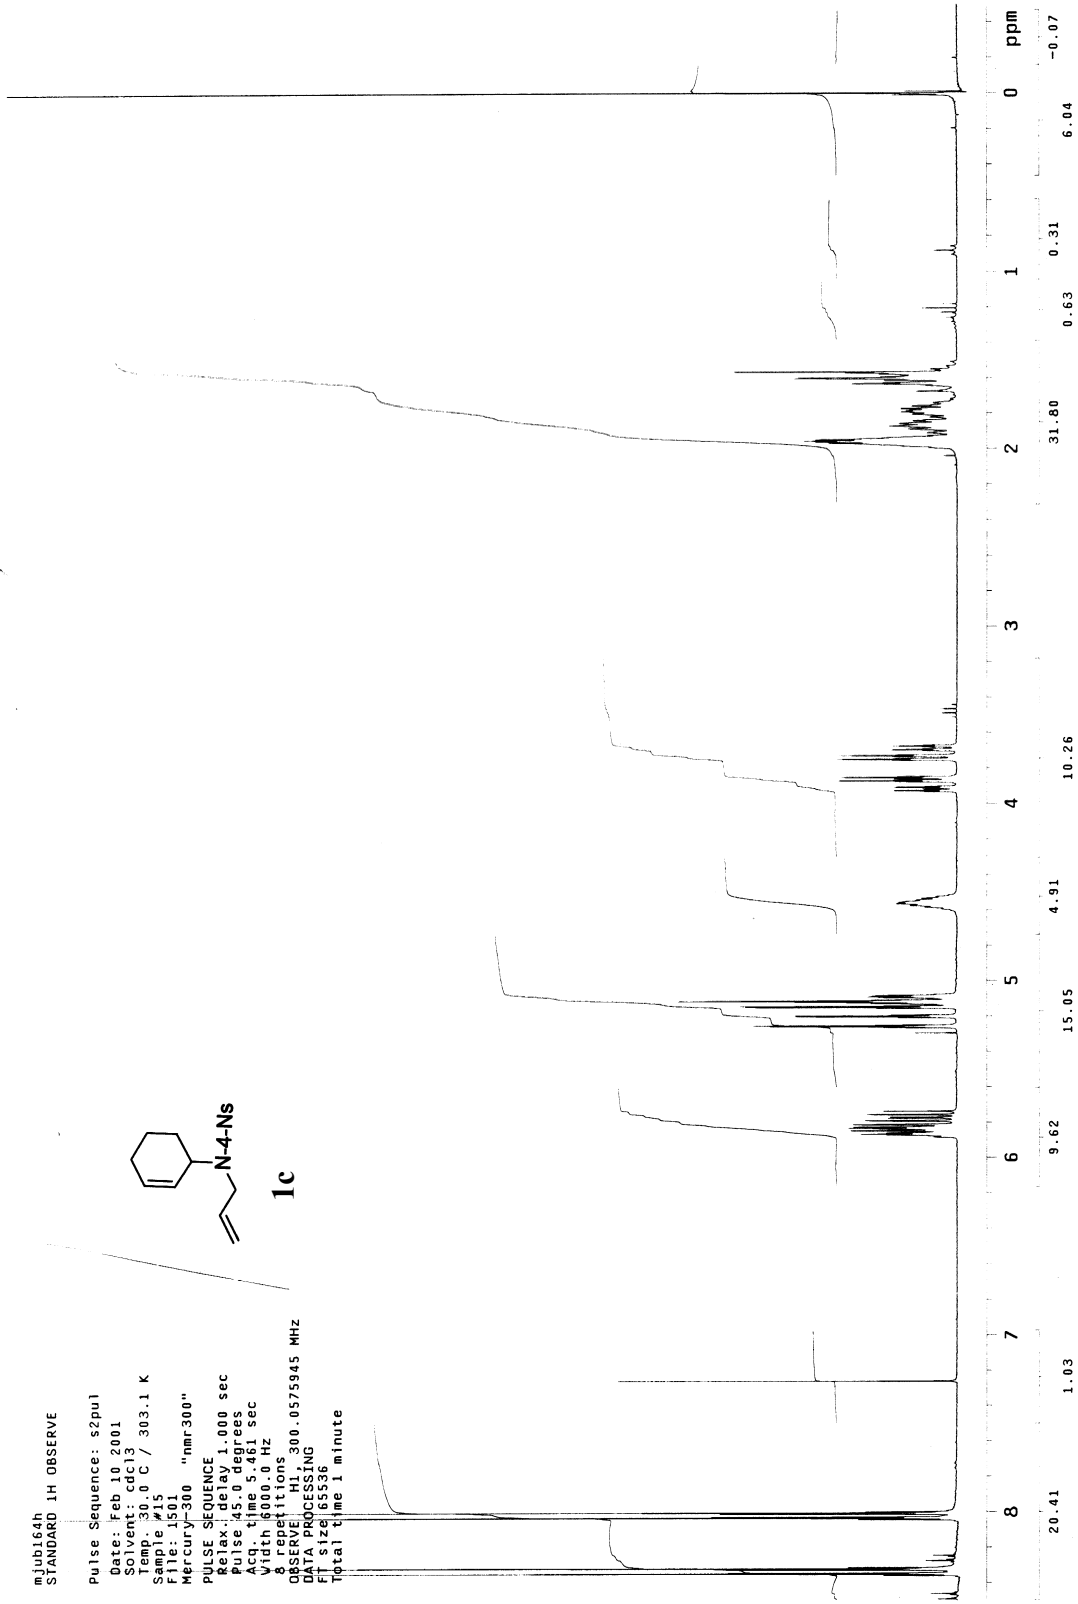

mjb164carbon  
13C OBSERVE

Pulse Sequence: s2pu1  
Date: Feb 10 2001  
Solvent: cdcl3  
Temp. 30.0 C / 303.1 K  
Sample #18  
File: 1801  
Mercury-300 "nmr300"

PULSE SEQUENCE  
Relax. delay 1.000 sec  
Pulse 45.0 degrees  
Acq. time 1.815 sec  
Width 17000.0 Hz  
256 repetitions  
OBSERVE C13, 75.485422 MHz  
PULSE 39 dB, 300.6590417 MHz  
continuously on  
WALTZ-16 modulated  
DATA PROCESSING  
Line broadening 1.0 Hz  
FT size 65536  
Total time 12 minutes

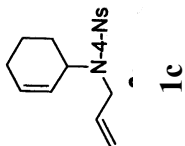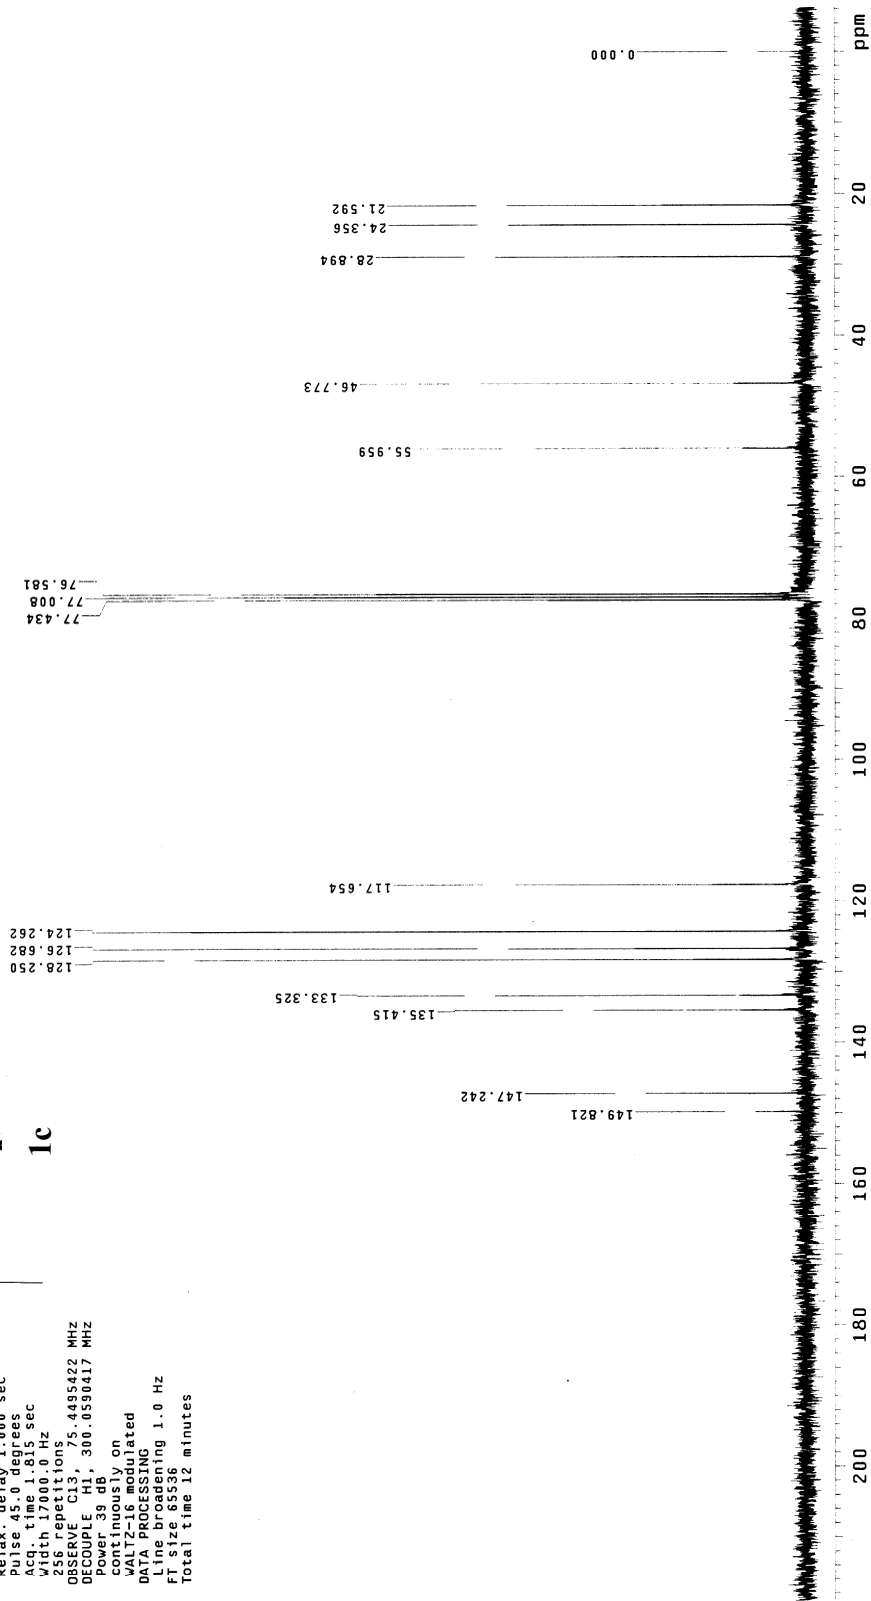

njun120solid  
STANDARD 1H OBSERVE

Pulse Sequence: s2pu1  
Date: Nov 17 2000  
Solvent: cdCl3  
Temp: 30.0 C / 303.1 K  
Sample #22  
File: 2201  
Mercury-300 "nmr300"  
PULSE SEQUENCE  
Relax. delay 1.000 sec  
Pulse 45.0 degrees  
Acq. time 5.461 sec  
Width 6000.0 Hz  
8 repetitions  
OBSERVE HI, 300.0575952 MHz  
DATA PROCESSING  
F1 size 18536  
Total time 1 minute

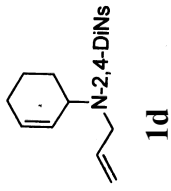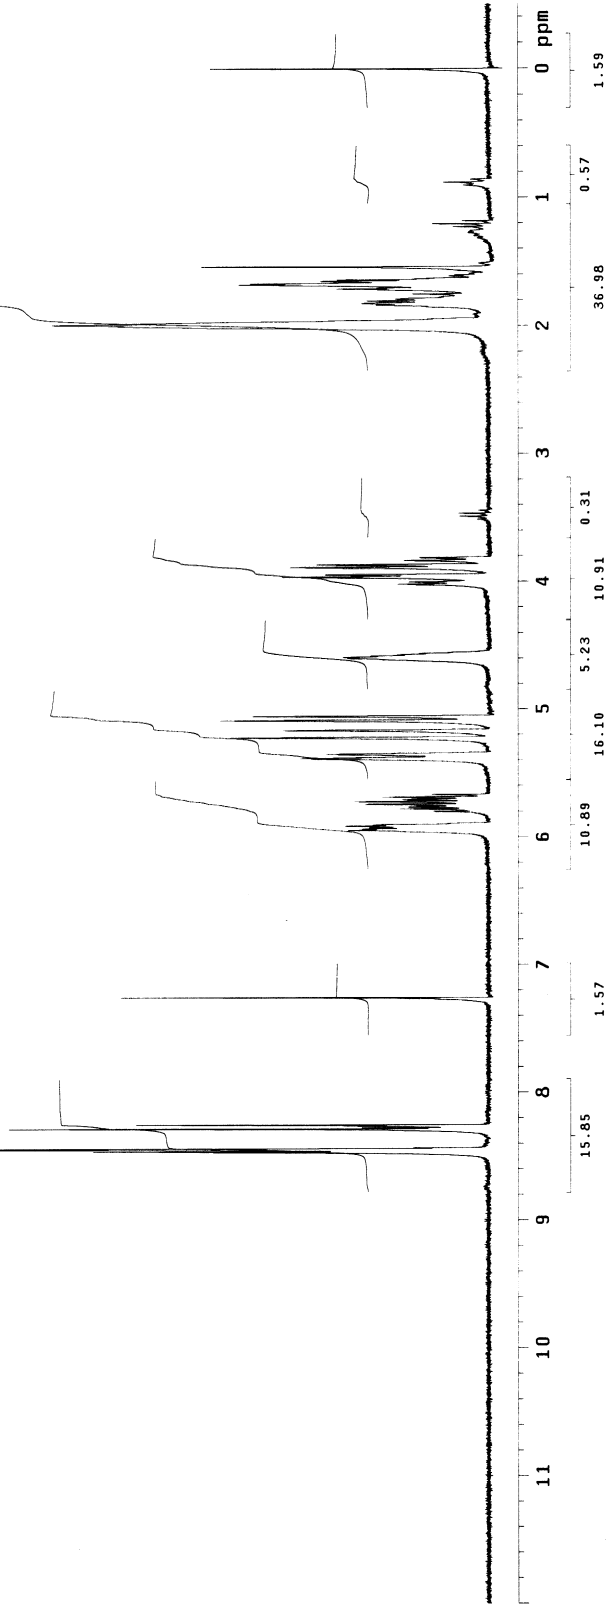





mJ-ub108  
STANDARD 1H OBSERVE

Pulse Sequence: s2pul  
Date: Jul 12 2001  
Solvent: cdCl3  
Temp: 30.0 C / 303.1 K  
Sample: 103  
C13  
Mercury-30088 "nmr300"

PULSE SEQUENCE  
Relax. delay 1.000 sec  
Pulse prg: zgpg30  
Acq. time: 5.481 sec  
Width: 6000.0 HZ  
8 repetitions  
OBSERVE H1, 300.0575925 MHZ  
DATA PROCESSING  
FT size 65536  
Total time 1 minute

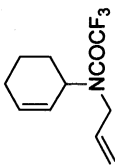

1e

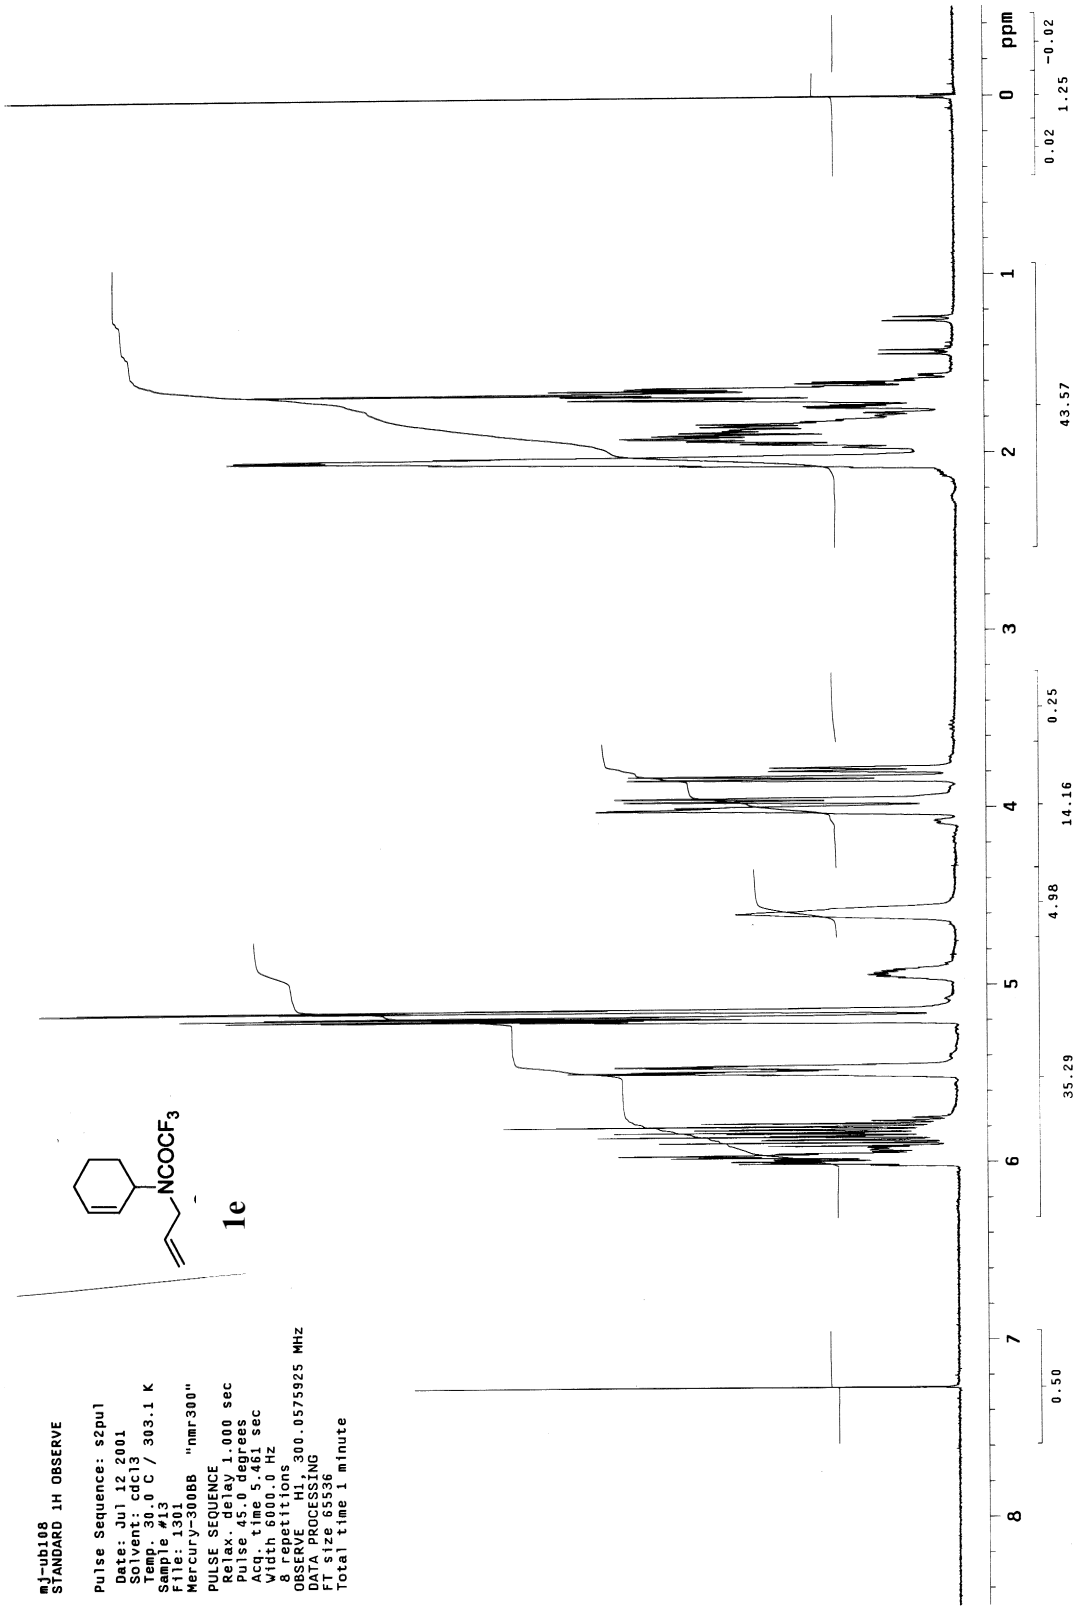

mj-ub108  
13C OBSERVE

Pulse Sequence: s2pul

Date: Jul 12 2001  
Time: 16:13

Temp: 30.0 C / 303.1 K

Sample #13

File: 1302

Mercury-3000B "nmr300"

PULSE SEQUENCE

Relax delay 1.000 sec

Pulse 45.0 degrees

Acq. time 1.815 sec

Width 17000.0 Hz

1024 repetitions

OBSERVE C13, 75.4495244 MHz

Power 39 dB

Continuously on

VOLTAGE MODULATED

DATA PROCESSING

Line broadening 1.0 Hz

FT size 65536

Total time 48 minutes

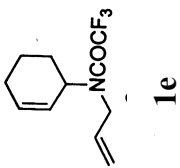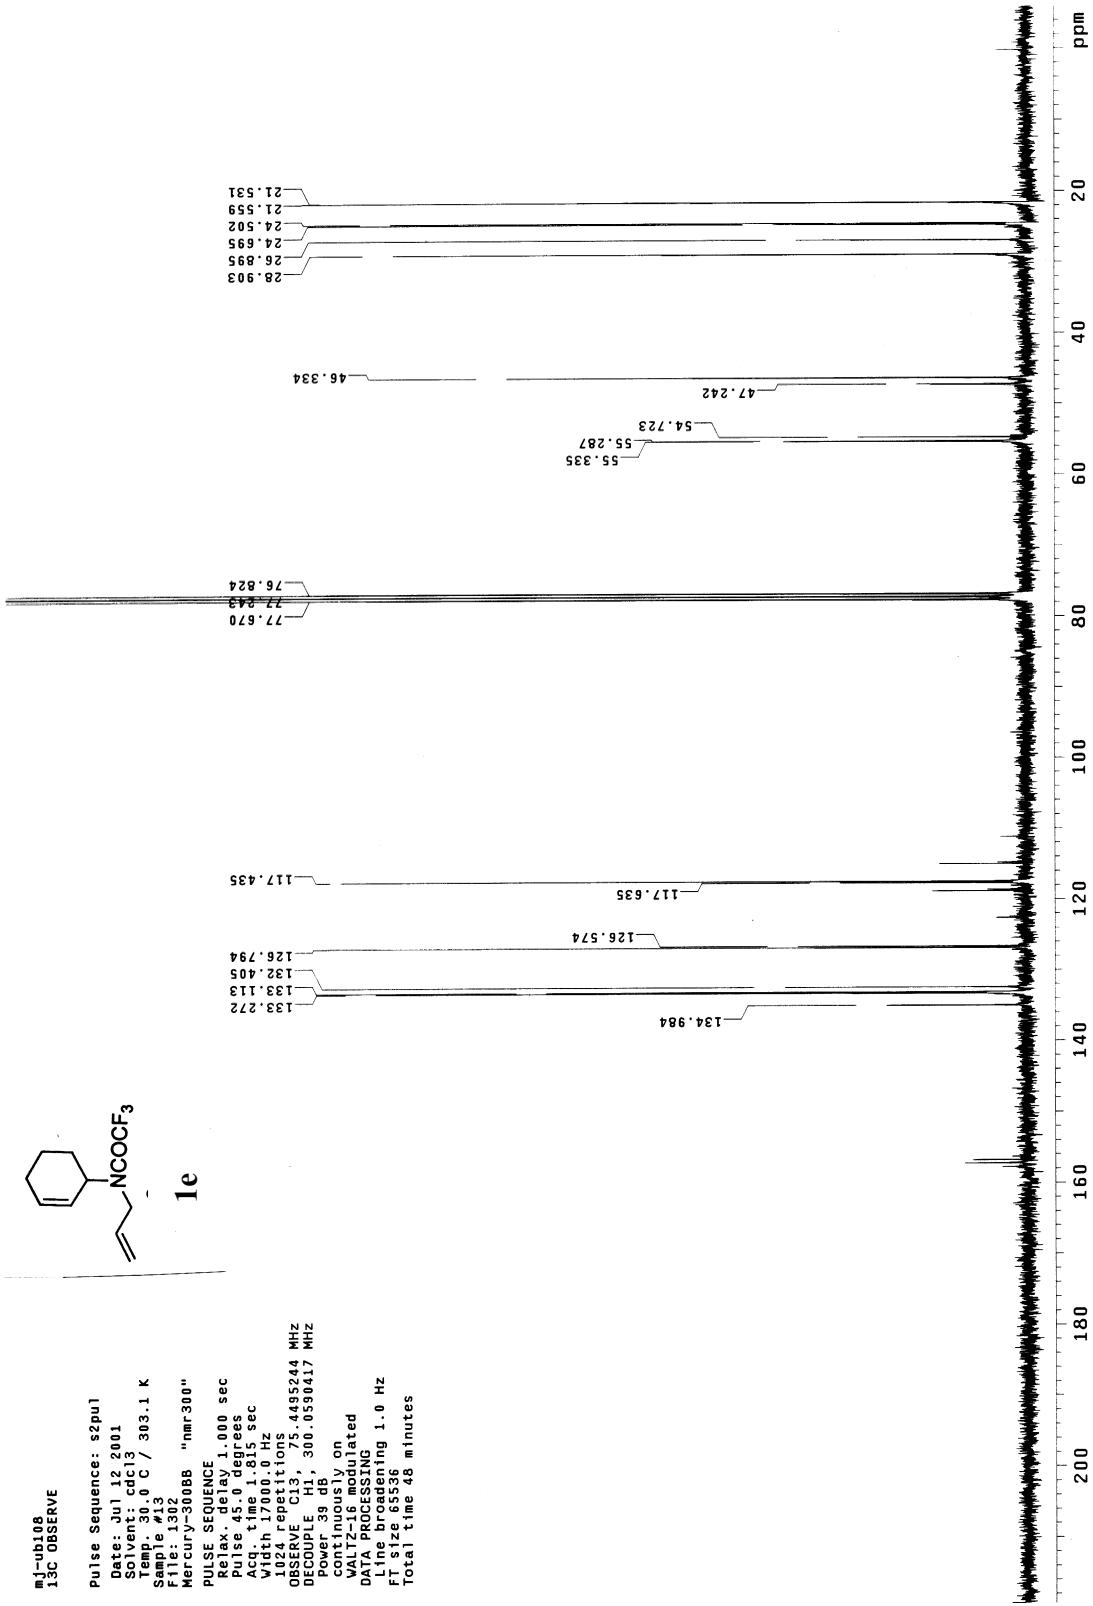

MUBI5FPROTON  
STANDARD 1H OBSERVE

Pulse Sequence: sZpu1  
Date: Feb 10 2001  
Solvent: cdCl3  
Temp: 30.0 C / 303.1 K  
Sample #19  
File: 1901  
Mercury-300 "nmr300"  
PULSE SEQUENCE  
Relax. delay 1.000 sec  
Pulse 45.0 degrees  
Acq. time 5.461 sec  
Width 6000.0 Hz  
8 repetitions  
OBSERVE HL 300.0575823 MHz  
DATA PROCESSING  
File: 1901  
Total time 1 minute

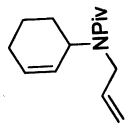

1f

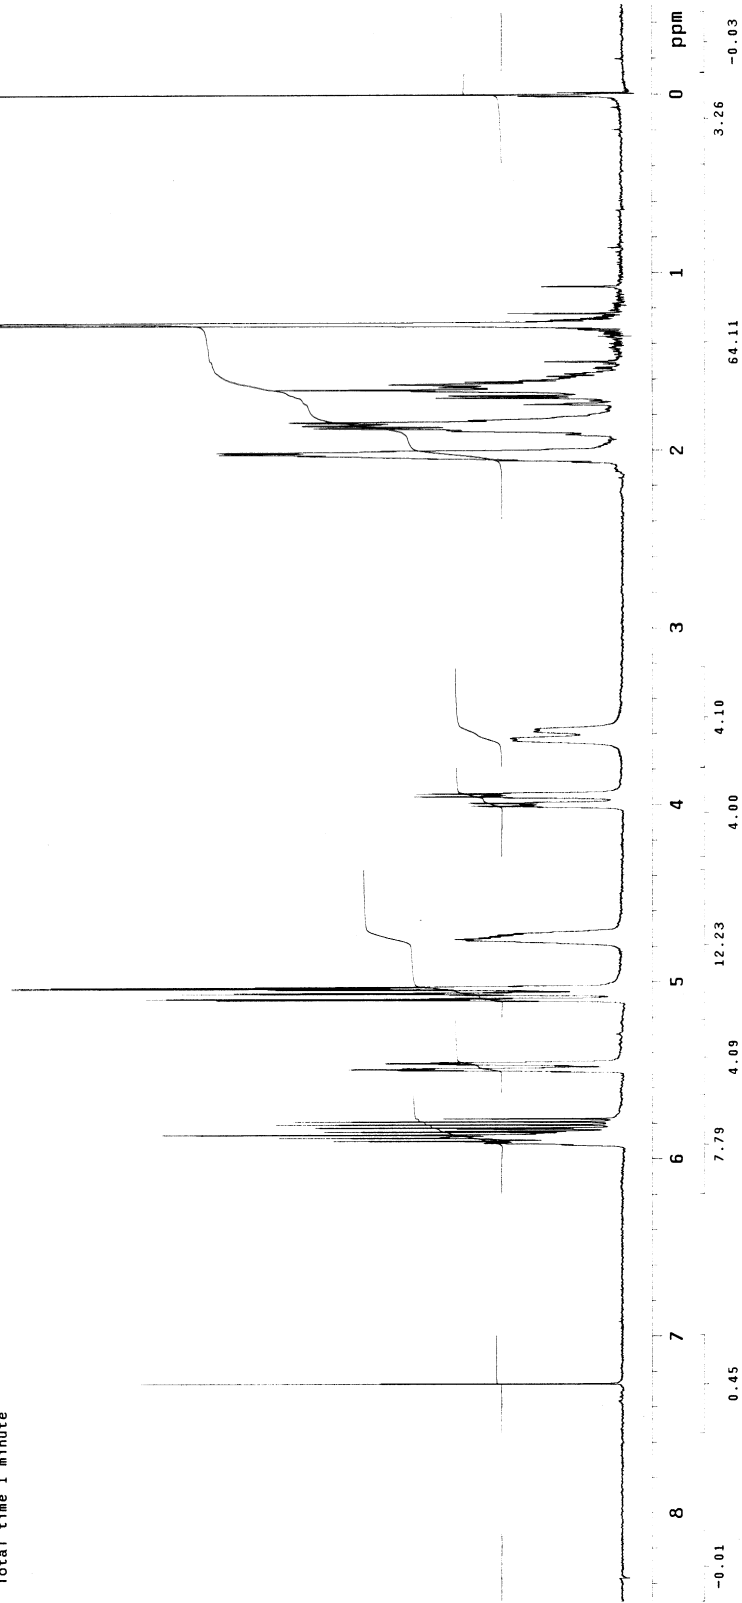

mj10165carbon  
13C OBSERVE

Pulse Sequence: s2pul  
Date: Feb 10 2001  
Solvent: cdCl3  
Temp: 30.0 C / 303.1 K  
Sample #19  
File: 1902  
Mercury-300 "nmr300"  
PULSE SEQUENCE  
Relax: delay 1.000 sec  
Pulse 45.0 degrees  
Acq. time 1.815 sec  
Width 17000.0 Hz  
256 repetitions  
OBSERVE C13, 75.4455244 MHz  
DECOUPLE H1, 300.0590417 MHz  
Power 35 dB  
C13 frequency on  
Channel 1  
VOLT-16 modulated  
DATA PROCESSING  
Line broadening 1.0 Hz  
FT size 65536  
Total time 12 minutes

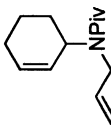

1f

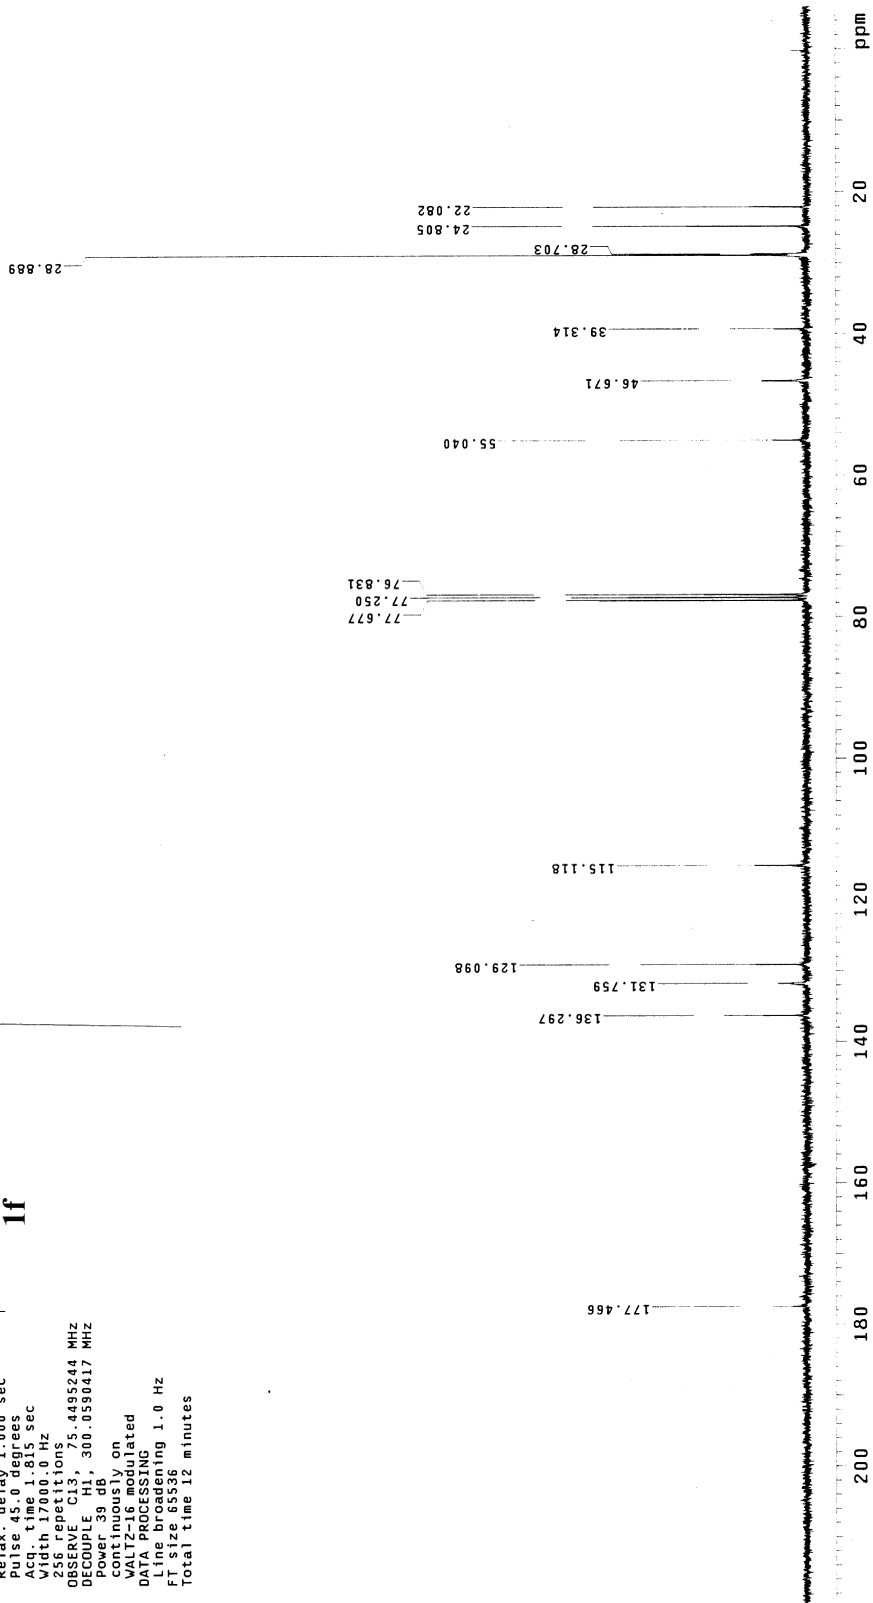

mjub100proton  
STANDARD\_1H OBSERVE

Pulse Sequence: szpul  
Date: Oct 6 2000  
Solvent: CDCl3  
Temp: 30.0 C / 303.1 K  
Sample #: 23  
File: 302  
Mercury-300 "nmr-300"  
PULSE\_SEQUENCE  
Relax delay 1.000 sec  
Pulse 45.0 degrees  
Acq. time 5.461 sec  
Width 6000.0 Hz  
8 repetitions  
OBSERVE H1, 300.0575954 MHz  
DATA PROCESSING  
F1 size 65536  
Total time 1 minute

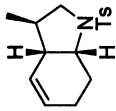

2a

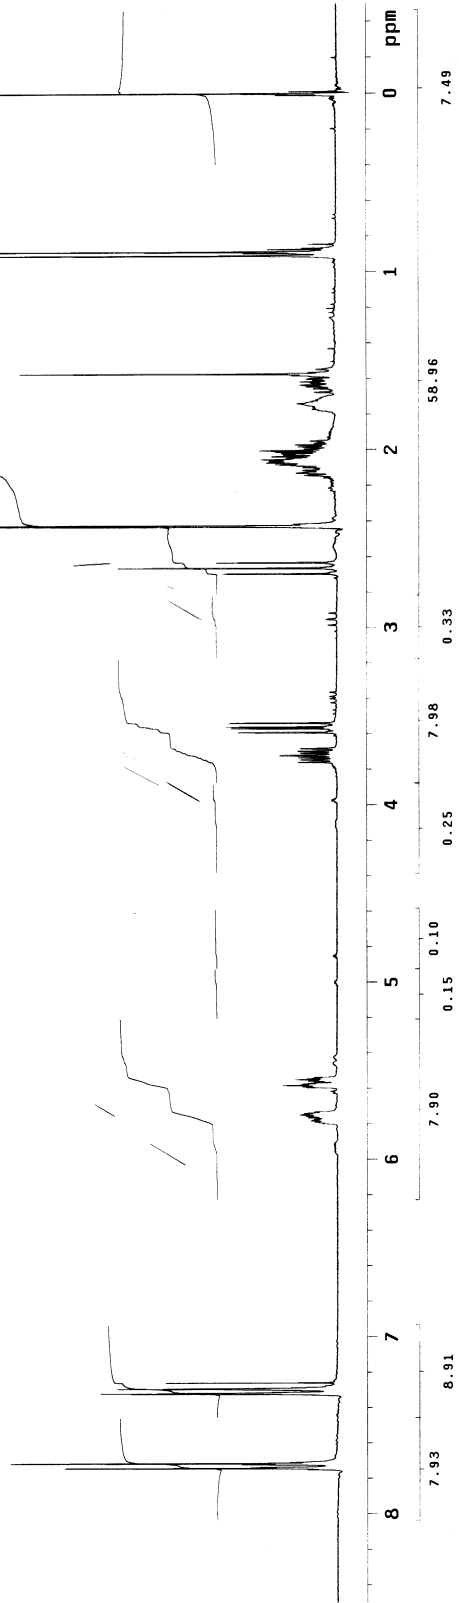

mjob100carbon  
13C OBSERVE

Pulse Sequence: s2pul  
Date: Oct 10, 2000  
Solvent: cdcl3  
Temp: 30.0 C / 303.1 K  
Sample: #34  
File: 3401  
Mercury-300 "nmr300"

PULSE SEQUENCE  
Relax: delay 1.000 sec  
Pulse 45.0 degrees  
Acq. time 1.815 sec  
Width 17000.0 Hz  
256 repetitions

OBSERVE: C13, 75.4495422 MHz  
DECOUPLE: H1, 300.0590417 MHz  
Power: 30.0 dB, on  
Modulation: on  
VALTZ-16 modulated  
DATA PROCESSING  
Line broadening 1.0 Hz  
FT size 65536  
Total time 12 minutes

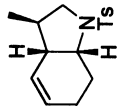

2a

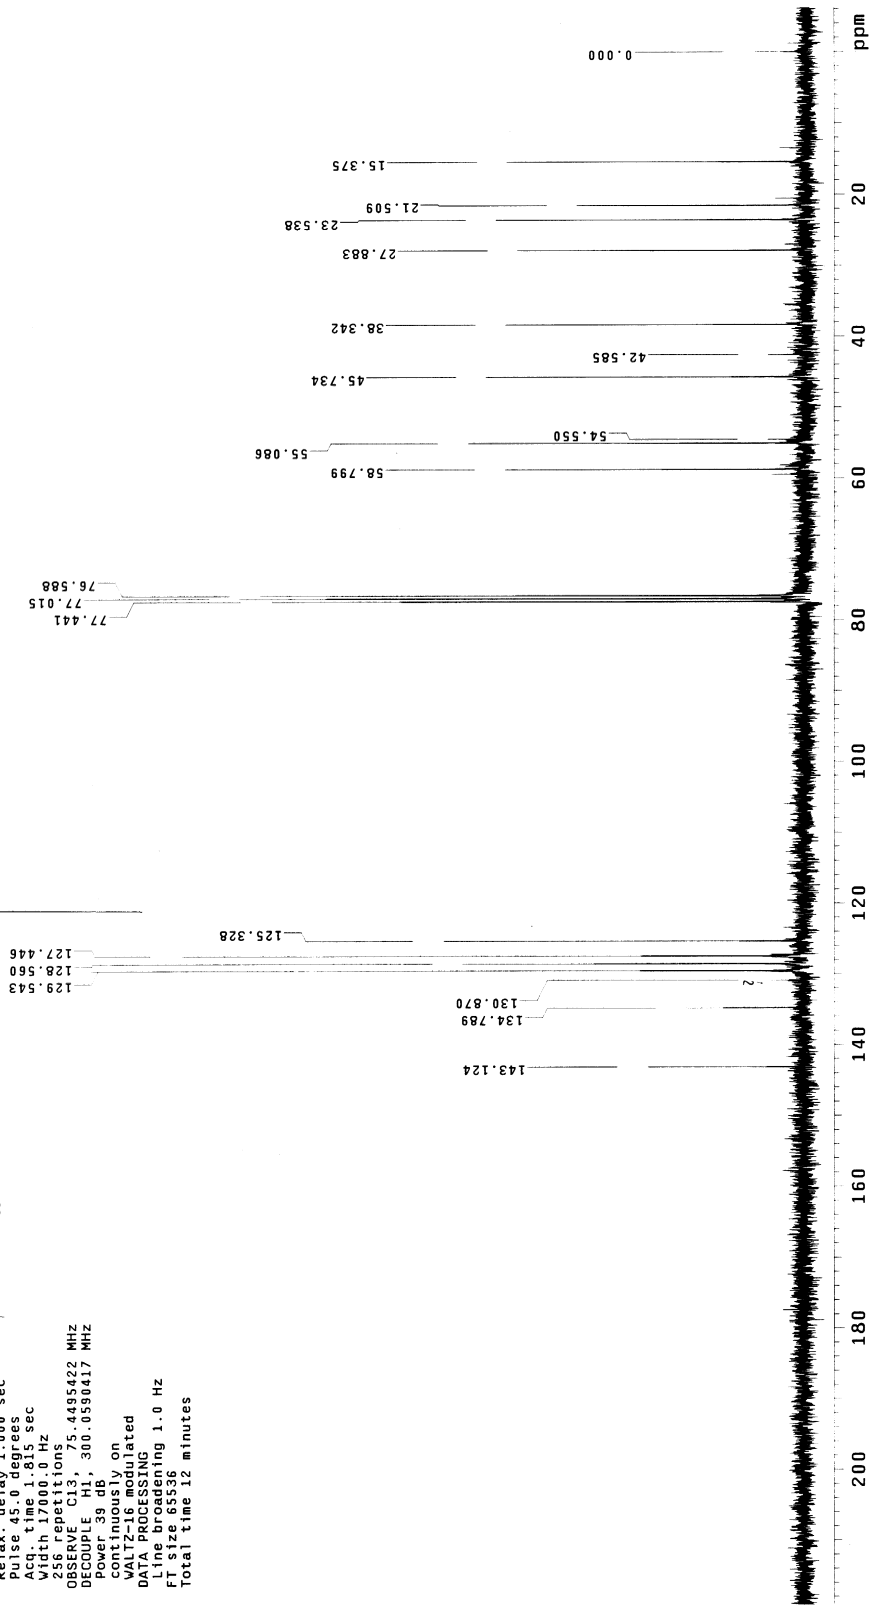

mju0140b  
STANDARD 1H OBSERVE

Pulse Sequence: s2pul  
Date: Dec 17 2000  
Solvent: cdcl3  
Temp: 30.0 C / 303.1 K  
Sample #12  
File: 1201  
Mercury-300 "nmr300"  
PULSE SEQUENCE  
Relax. delay 1.000 sec  
Pulse 45.0 degrees  
Acq. time 5.461 sec  
Width 6000.0 Hz  
8 repetitions  
OBSERVE H1, 300.0575958 MHz  
DATA PROCESSING  
F1 size 16536  
Total time 1 minute

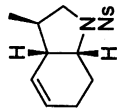

2b

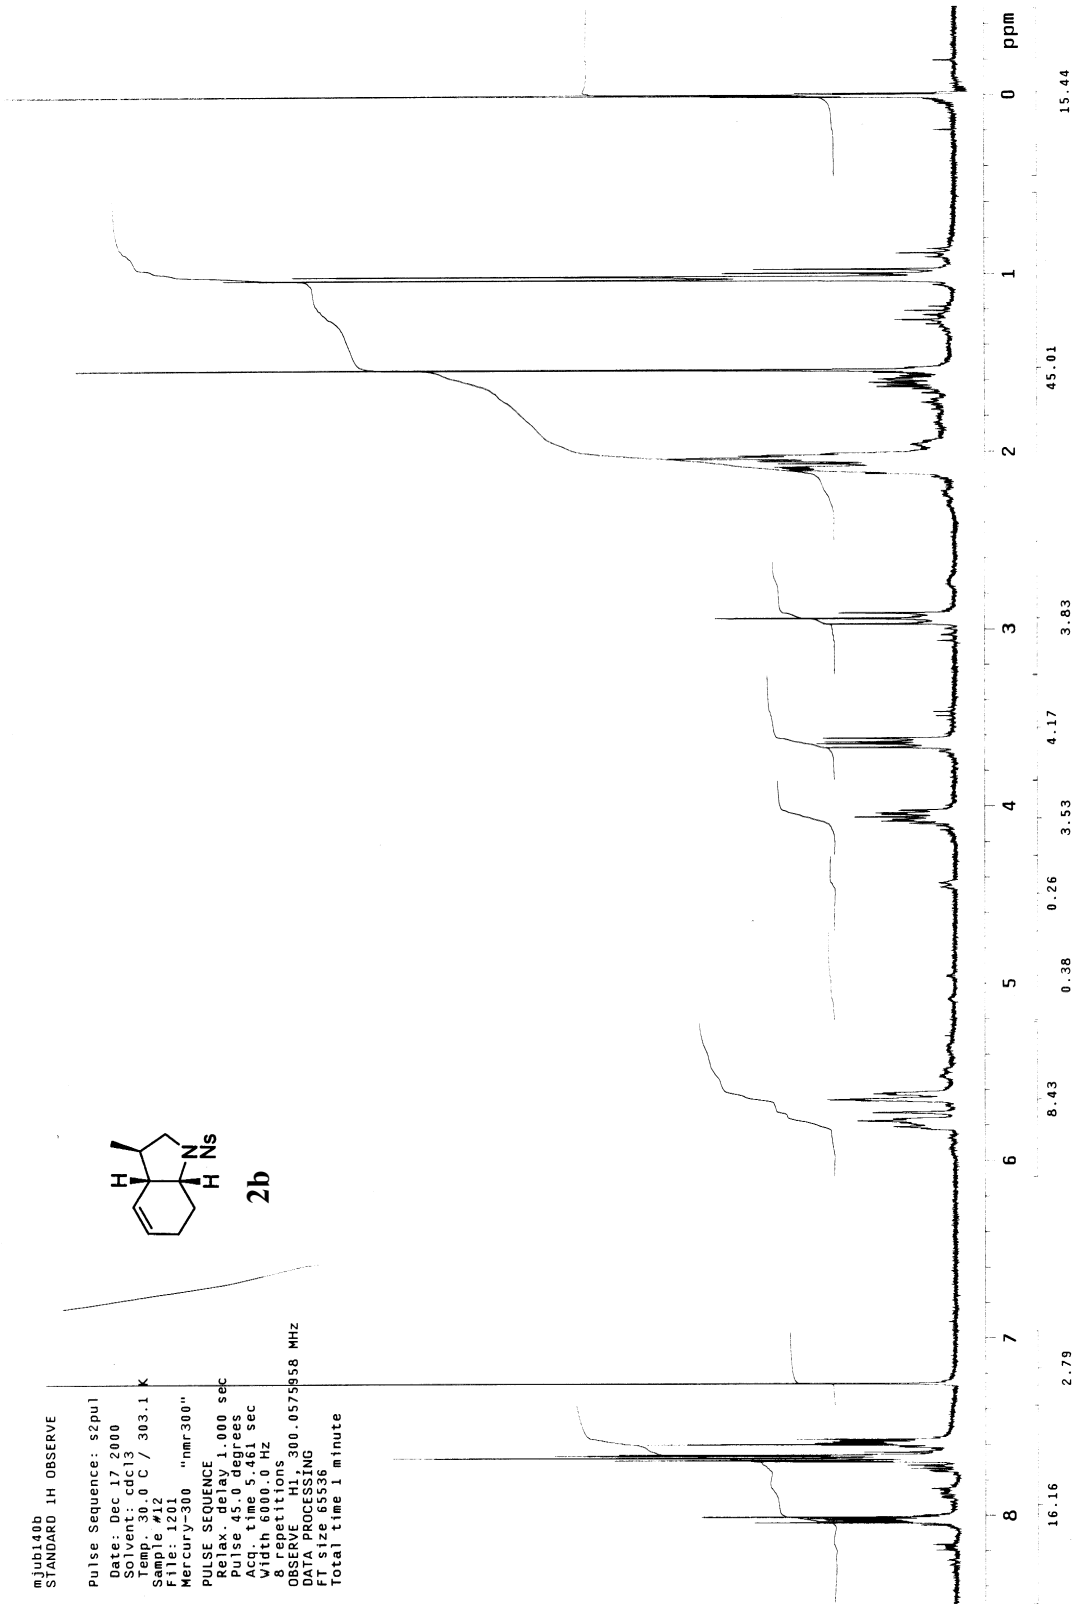

njob140c13  
13C OBSERVE

Pulse Sequence: s2pul  
Date: Jan 3 2001  
Solvent: cdCl3  
Temp: 30.0 C / 303.1 K  
Sample #2  
File: 203  
Mercury-300 "nmr300"

PULSE SEQUENCE  
Relax: delay 1.000 sec  
Pulse 45.0 degrees  
Acq. time 1.815 sec  
Width 17000.0 Hz  
256 repetitions  
OBSERVE C13, 75.4495422 MHz  
DECOUPLE H1, 300.0590417 MHz  
Power 33.0 dB  
C13 channel on  
WALT-16 modulated  
DATA PROCESSING  
Line broadening 1.0 Hz  
FT size 65536  
Total time 12 minutes

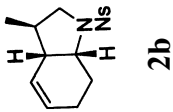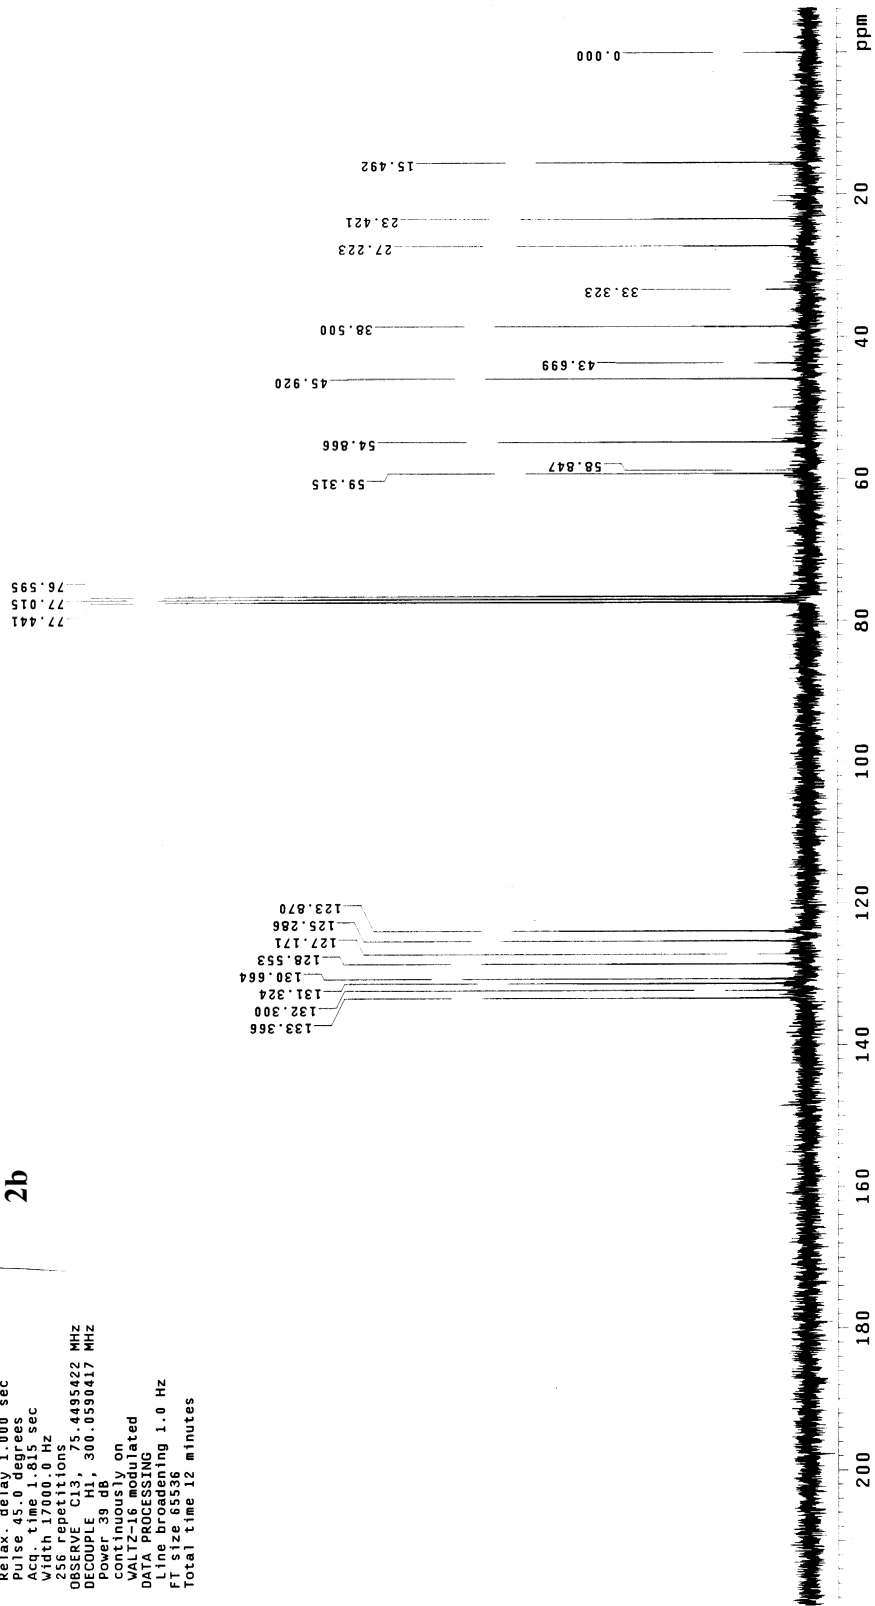



mjb167firstcrystalization  
STANDARD 1H OBSERVE

Pulse Sequence: s2pu1  
Date: Feb 16 2001  
Solvent: cdcl3  
Temp. 30.0 C / 303.1 K  
Sample #32  
File: 3201  
Mercury-300 "nmr300"  
PULSE SEQUENCE  
Relax. delay 1.000 sec  
Pulse 45.0 degrees  
Acq. time 5.461 sec  
Width 6000.0 Hz  
8 repetitions  
OBSERVE HL, 300.0575947 MHz  
DATA PROCESSING  
File: 3201  
Total time 1 minute

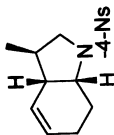

2C

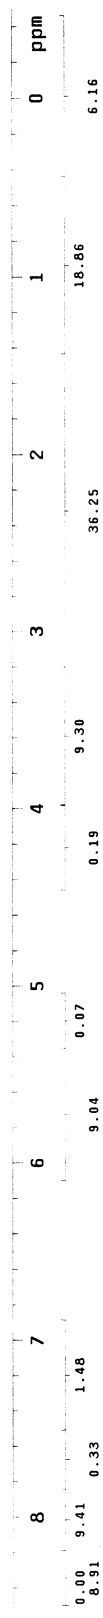

mjb167firtcryst  
13C OBSERVE

Pulse Sequence: s2pu1  
Date: Feb 16 2001  
Solvent: cdcl3  
Temp. 30.0 C / 303.1 K  
Sample #1  
File: 101  
Mercury-300 "nmr300"  
PULSE SEQUENCE  
Relax. delay 1.000 sec  
Pulse 45.0 degrees  
Acq. time 1.815 sec  
Width 17000.0 Hz  
256 repetitions  
OBSERVE C13, 75.4495244 MHz  
PULSE PR, 300.0590417 MHz  
Pulse 39 dB  
continuously on  
VOLTZ-16 modulated  
DATA PROCESSING  
Line broadening 1.0 Hz  
FT size 65536  
Total time 12 minutes

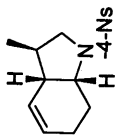

2c

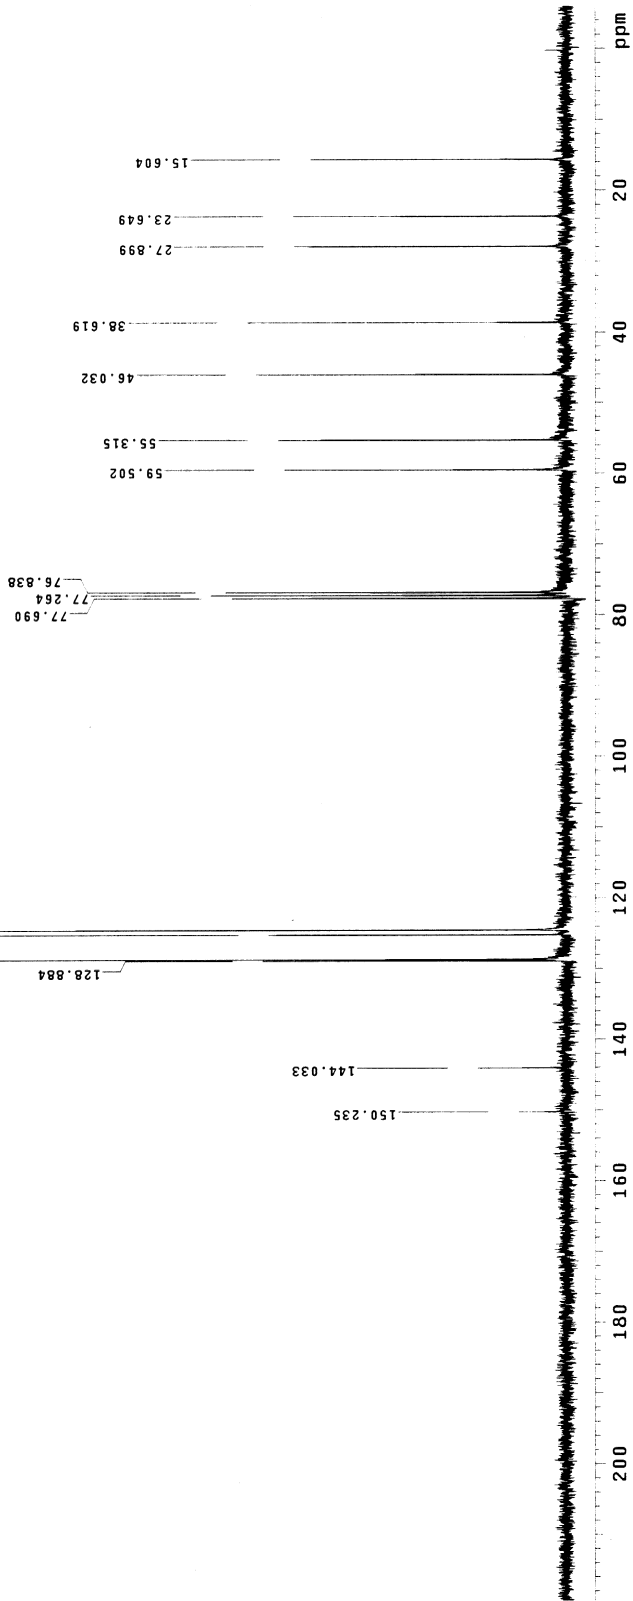

mj ub122  
STANDARD 1H OBSERVE

Pulse Sequence: s2pu1

Date: Jul 14 2001

Solvent: CDCl3

Temp: 30.0 C / 303.1 K

Sample #16

File: 1601

Mercury-300BB "nmr300"

PULSE SEQUENCE

Pulse delay: 1.000 sec

Pulse: 45.0 degrees

Acq. time: 5.461 sec

Width: 6000.0 Hz

64 repetitions

OBSERVE: H1, 300.0575867 MHz

DATA PROCESSING

FT size: 65536

Total time: 6 minutes

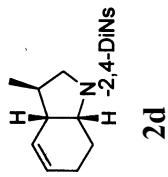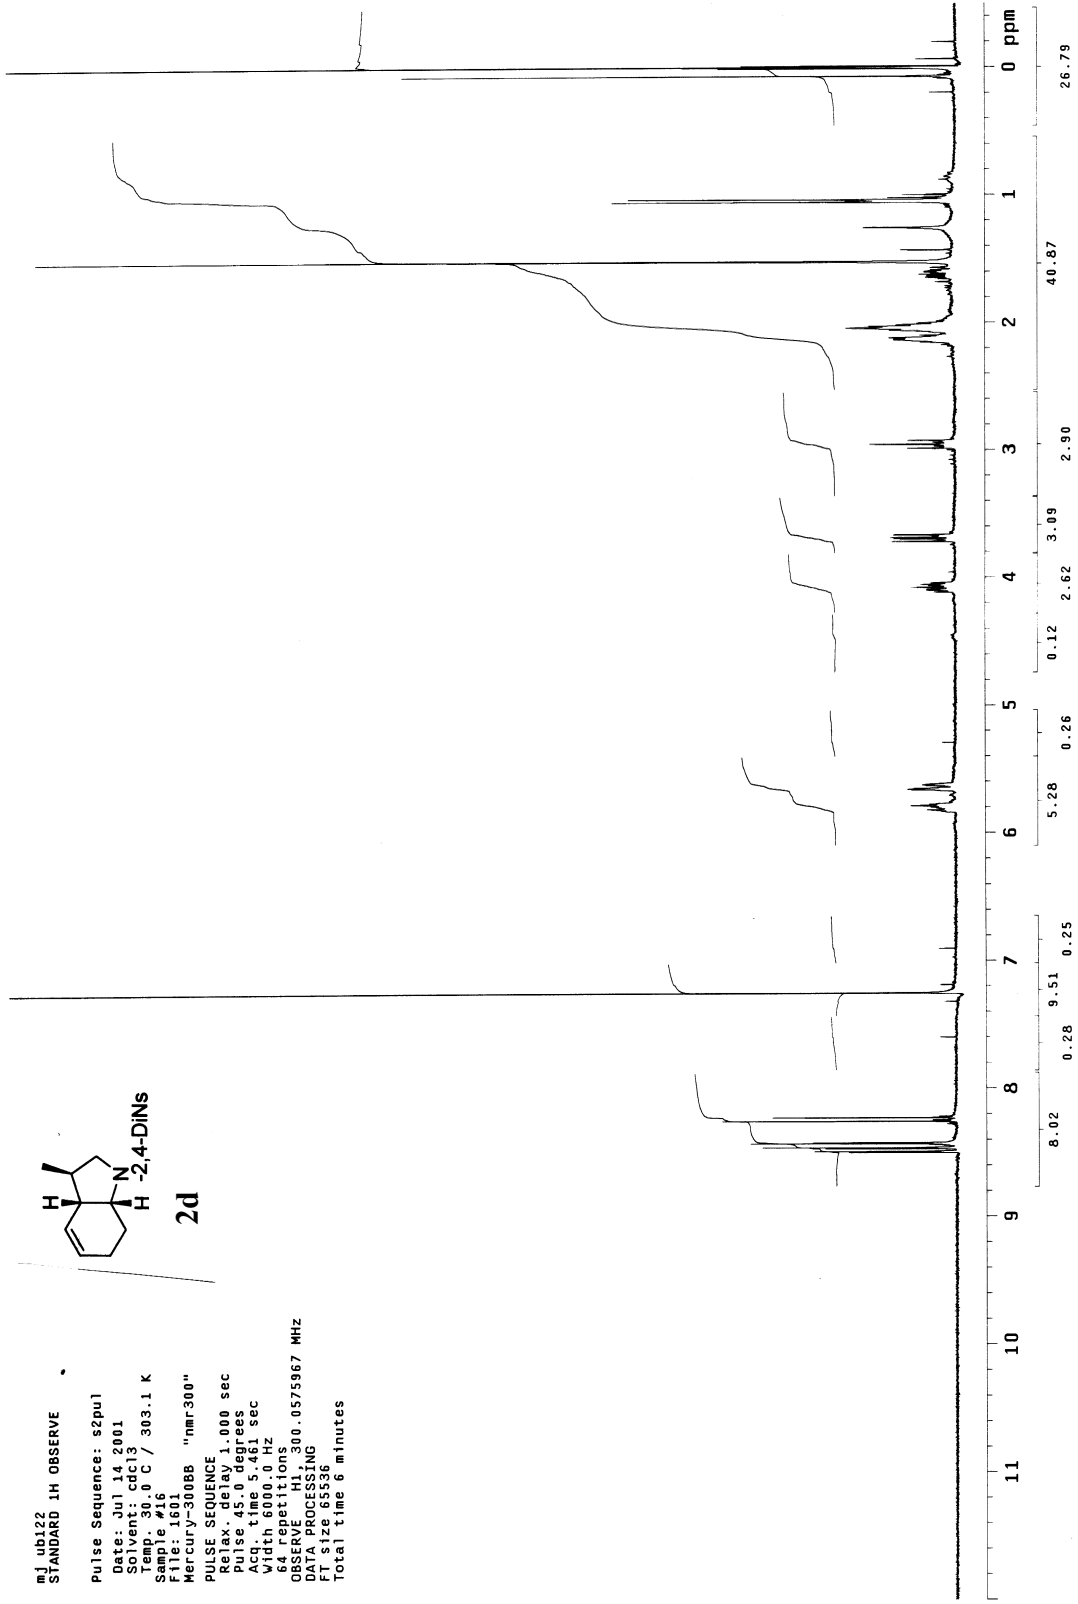

mj ub122  
13C OBSERVE

Pulse Sequence: s2pu1

Date: Jul 14 2001

Solvent: cdcl3

Temp: 30.0 C / 303.1 K

Sample: #16

File: 1602

Mercury-3000B "nmr300"

PULSE SEQUENCE

Relax delay 1.000 sec

Pulse: 45.0 degrees

Acq: time 1.815 sec

Width 17000.0 Hz

10000 repetitions

OBSERVE C13, 75.4485422 MHz

DECOUPLE H1, 300.0590417 MHz

Power 39 dB

continuously on

100% AMPLITUDE

DATA PROCESSING

Line broadening 1.0 Hz

FT size 65536

Total time 7.8 hours

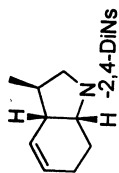

2d

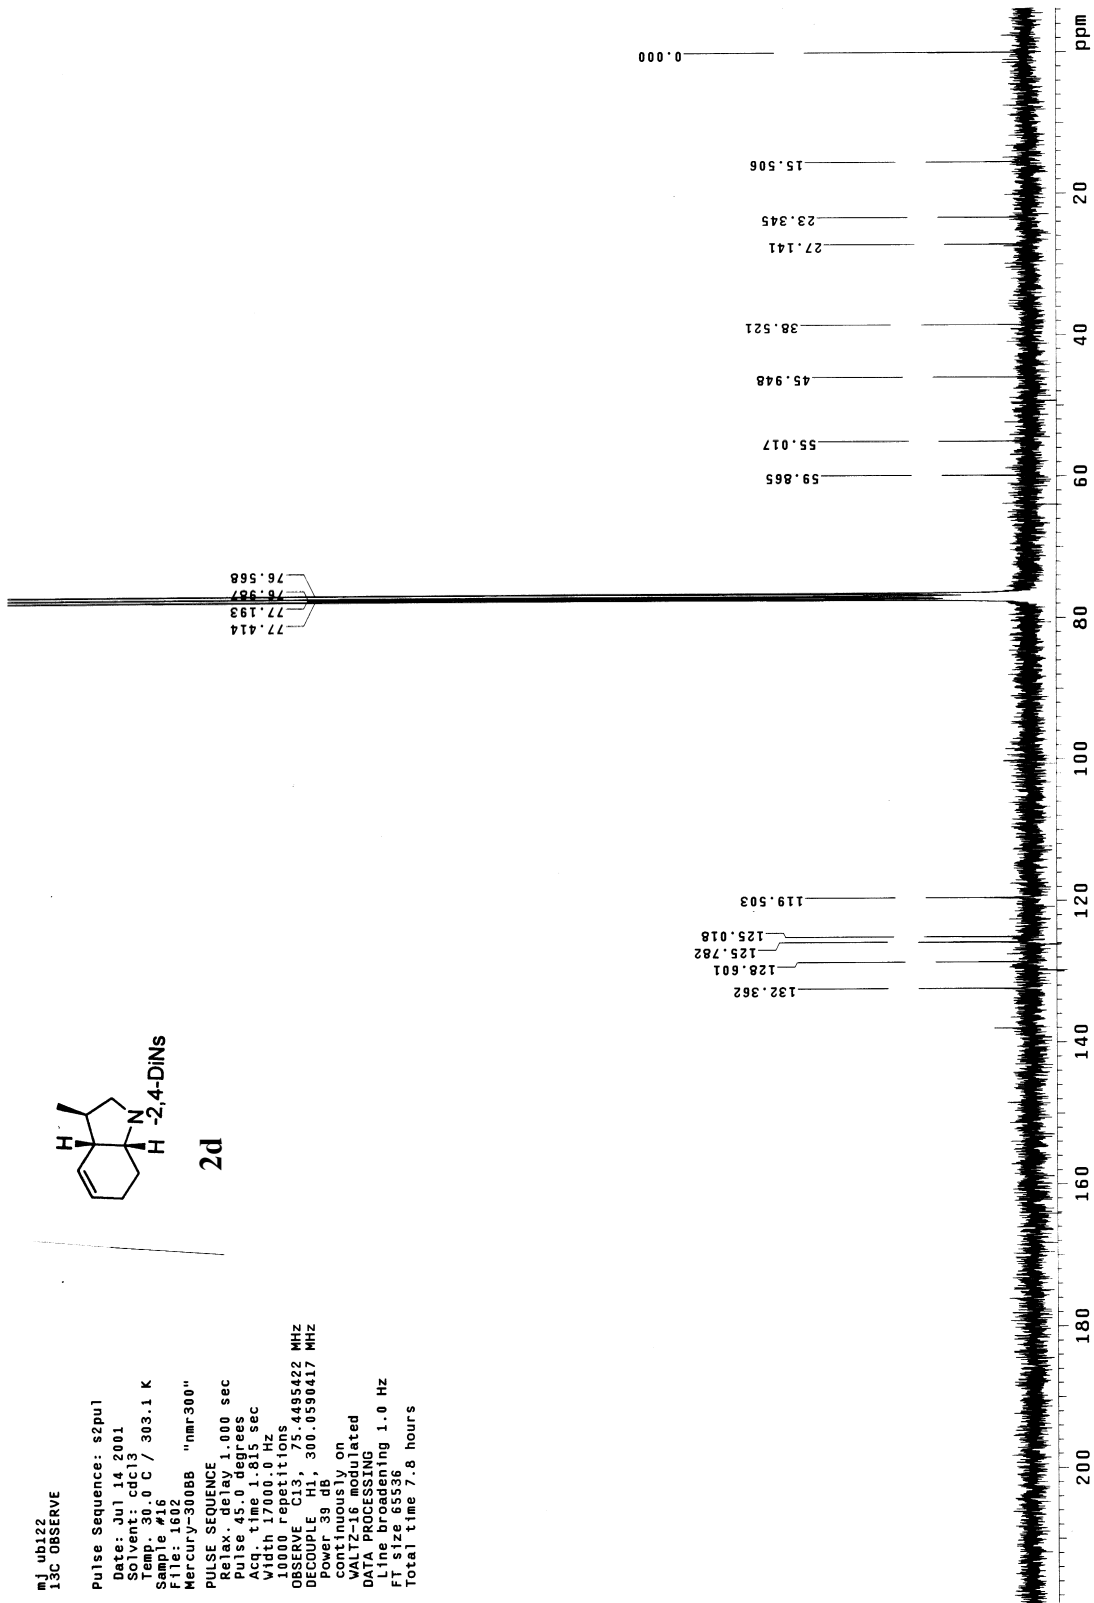



STANDARD CARBE

```

exp3 s2pul
SAMPLE Mar 26 2001 -DEC. & VT 499.870
date Mar 26 2001 dfrq H1
solvent CDC13 dn 32
file/export/home/~ dpr 0
jvite/vmrsys/data~ dof 0
jvite-26-3-01-ulr~ dm vvv
ich-UB187-13c dnm 11224
ACQUISITION dmf
sfrq 125.704 dseq
tn 1.03 dres 1.0
at 5612 temp 30.0
sv 25039.1 temp PROCESSING 0.50
fb not used lb wifile
bs 64 wifile
tpwr 62 proc ft
pw 8.0 fn not used f
di 0 math
nt 1000 werr
clock 207.8 wisp
gain 50 wnt
FLAGS n n
ll n
in n
dp n
hs nn
SP DISPLAY -619.1
wf 25039.1
vc 100
sc 0
WC 265
hzmm 94.49
fs 500.00
rf1 10285.5
rfp 9666.4
th 9
nms cdc 1.000
nm cdc ph
  
```

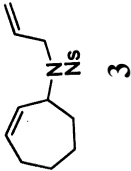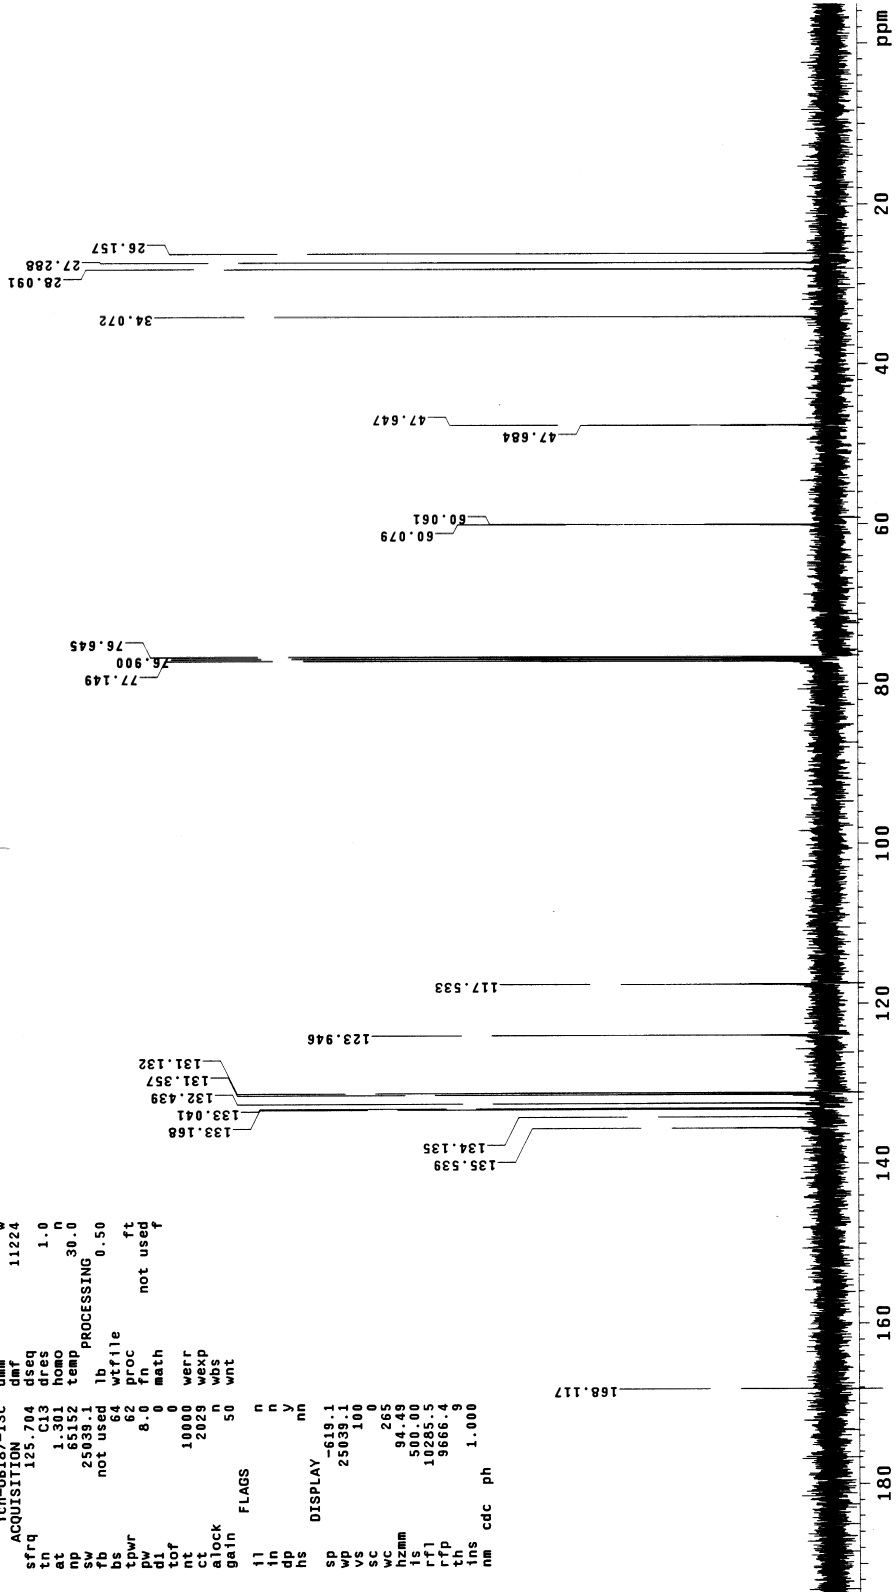

nj-ubi89  
STANDARD 1H OBSERVE

Pulse Sequence: s2pul  
Date: Jul 12 2001  
Solvent: CDCl3  
Temp: 30.0 C / 303.1 K  
Sample #9  
File: 901  
Mercury-300BB "nmr300"  
PULSE SEQUENCE  
Relax delay 1.000 sec  
Pulse 45.0 degrees  
Acq. time 5.461 sec  
Width 6000.0 Hz  
8 repetitions  
OBSERVE H1, 300.0575947 MHz  
DATA PROCESSING  
F1 size 65536  
Total time 1 minute

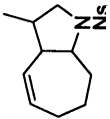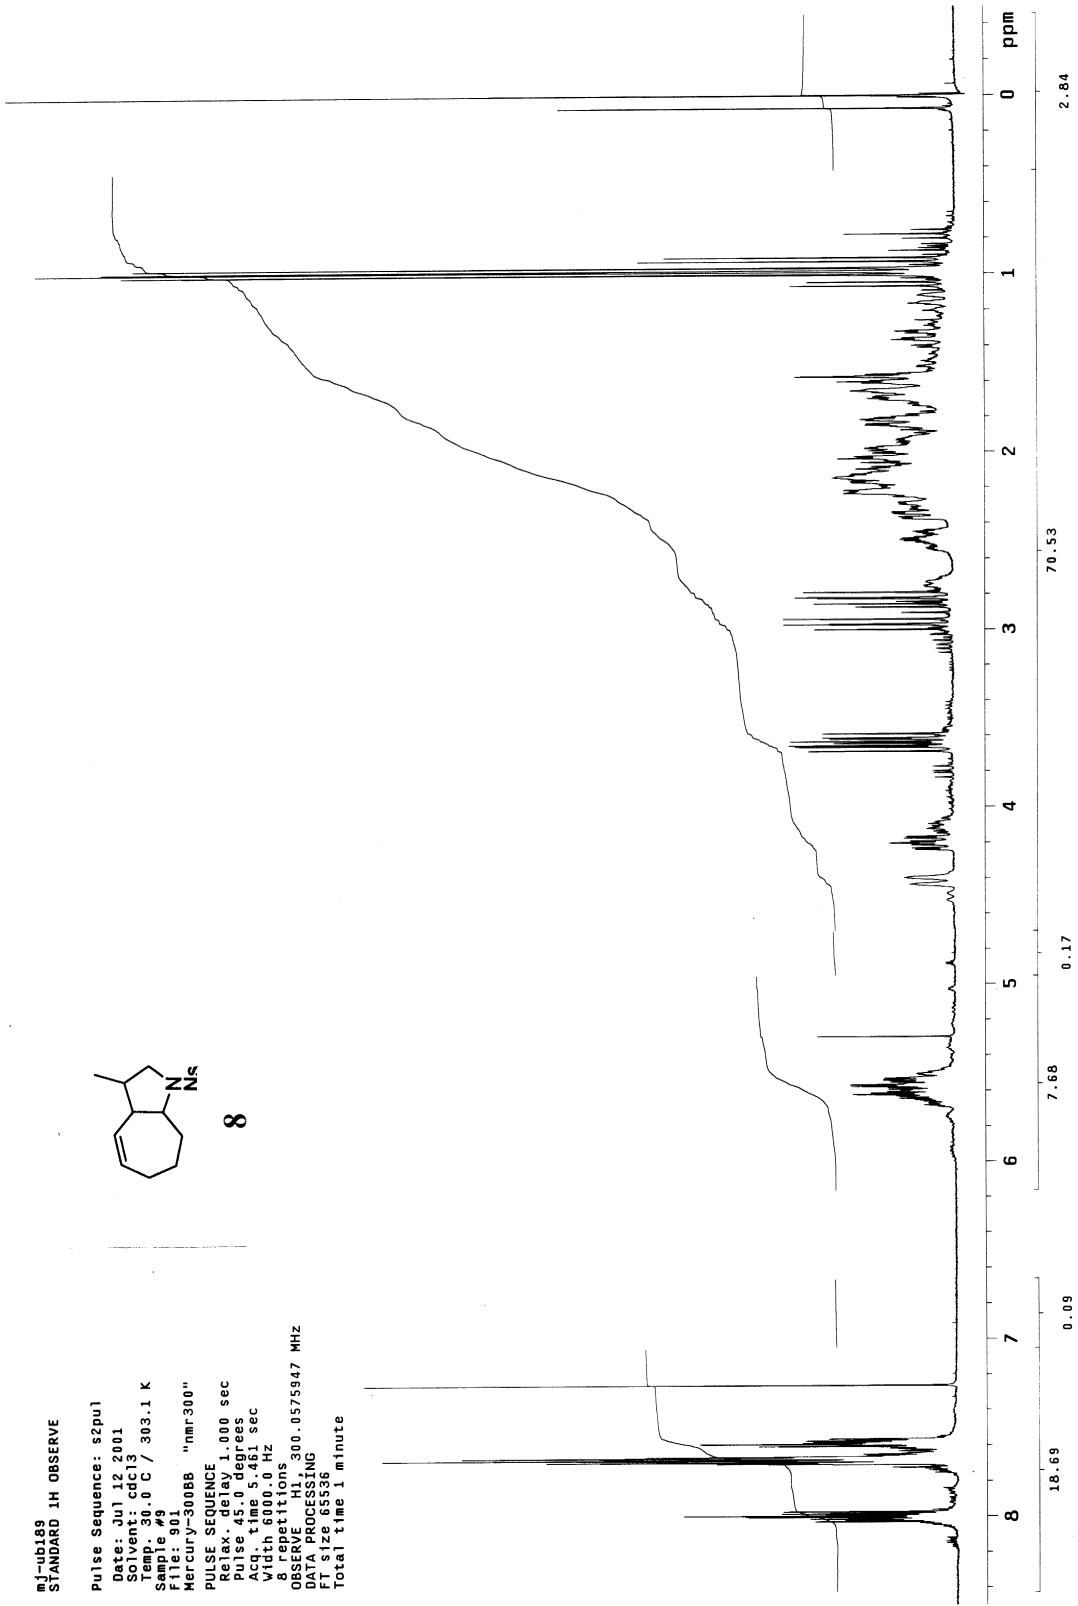





STANDARD PROTON PARAMETERS

Pulse Sequence: s2pu1  
Solvent: CDCl3  
Temp: 30.0 C / 303.1 K  
File: jyte-zs-01-Dirich-UBI85-1h  
INDVA 300 "nmr300"  
PULSE SEQUENCE  
Pulse 60.0 degrees  
Acq. time 2.345 sec  
Waltz 16 repeats  
OBSERVE H1 499.867732 MHZ  
DATA PROCESSING  
FT size 32768  
Total time 1 minute

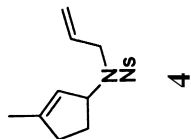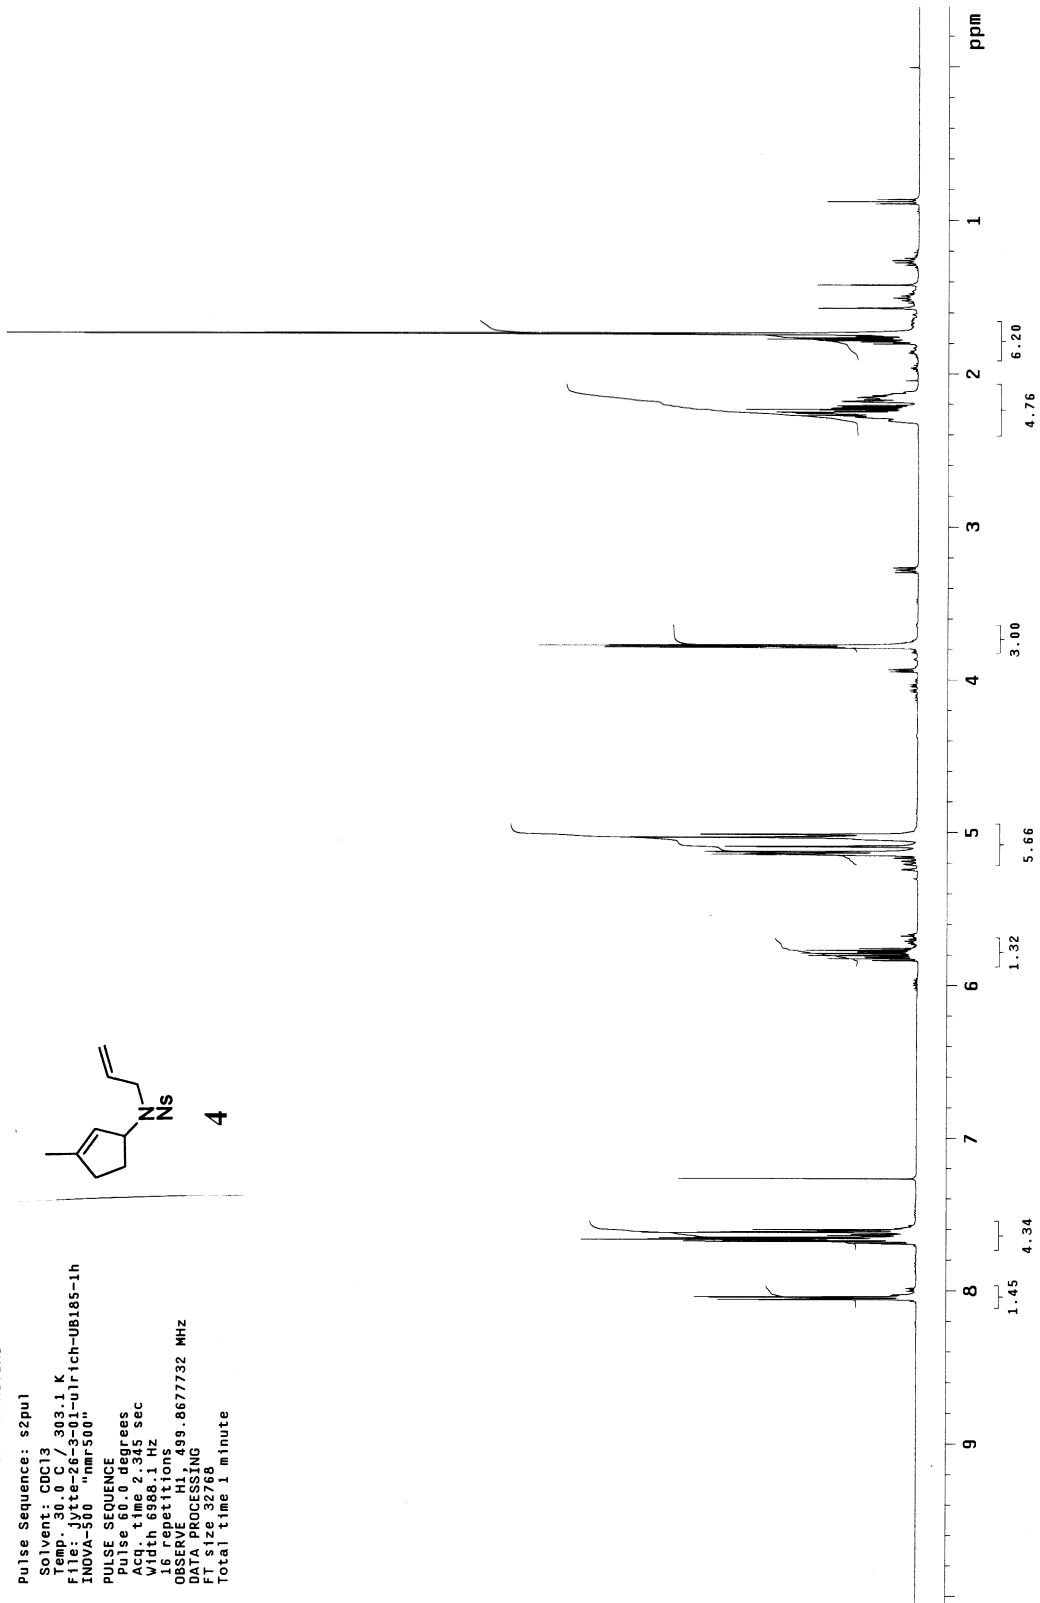

STANDARD CARBON PARAMETERS

```

exp3 s2pu1
SAMPLE Mar 26 2001 dfrq DEC. & VT
solvent CDC13 dn 499.870 H1
file /export/home/~ dpwr 32
jyite/vmr/sys/data~ dof 0
/jyite-26-3-01-uir~ dm yyy
ICH-08185-13C dnm 11224 W
ACQUISITION 704
sfreq 125.764 dnr
tn 125.764 dres
et 1.301 homo 1.0
nd 65152 temp 30.0
sw 25039.1 temp PROCESSING
fb not used lb 0.50
bs 64 wtfile
tpwr 62 proc not used
di 8.0 fn
cf 10000 werr
ct 3197 wexp
alock n wbs
gain 50 wnt
FLAGS
ll n
in n
dp y
ns DISPLAY nm
sp -517.5
wp 25039.1
vs 100
sc 0
wc 265
hzmm 94.49
ls 500.00
rfi 10196.6
rfp 9679.0
tms 1.000
nm cdc ph
  
```

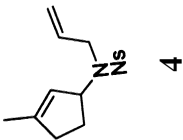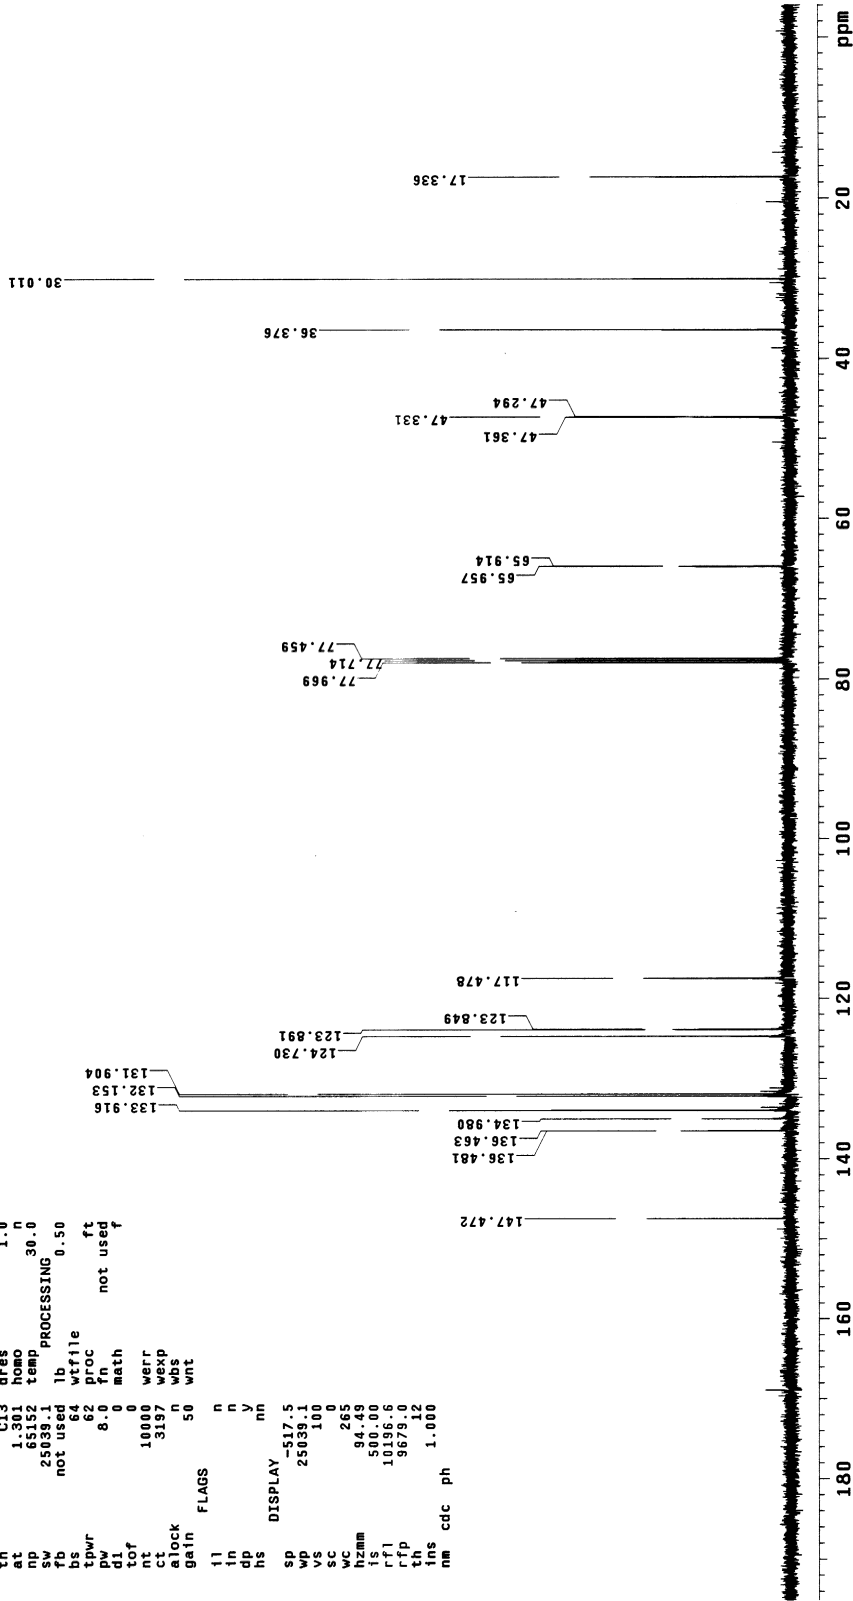

#J-ubi88  
STANDARD 1H OBSERVE

Pulse Sequence: s2pu1  
Date: Jul 12, 2001  
Ver: 4.13  
Temp: 30.0 C / 303.1 K  
Sample: #12  
File: 1201  
Mercury-30088 "nmr300"  
PULSE SEQUENCE  
Relax delay 1.000 sec  
Pulse 45.0 degrees  
Acq. time 5.461 sec  
Width 6000.0 Hz  
8 repetitions  
OBSERVE H1, 300.0575954 MHz  
DATA PROCESSING  
FI size 65536  
Total time 1 minute

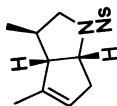

9

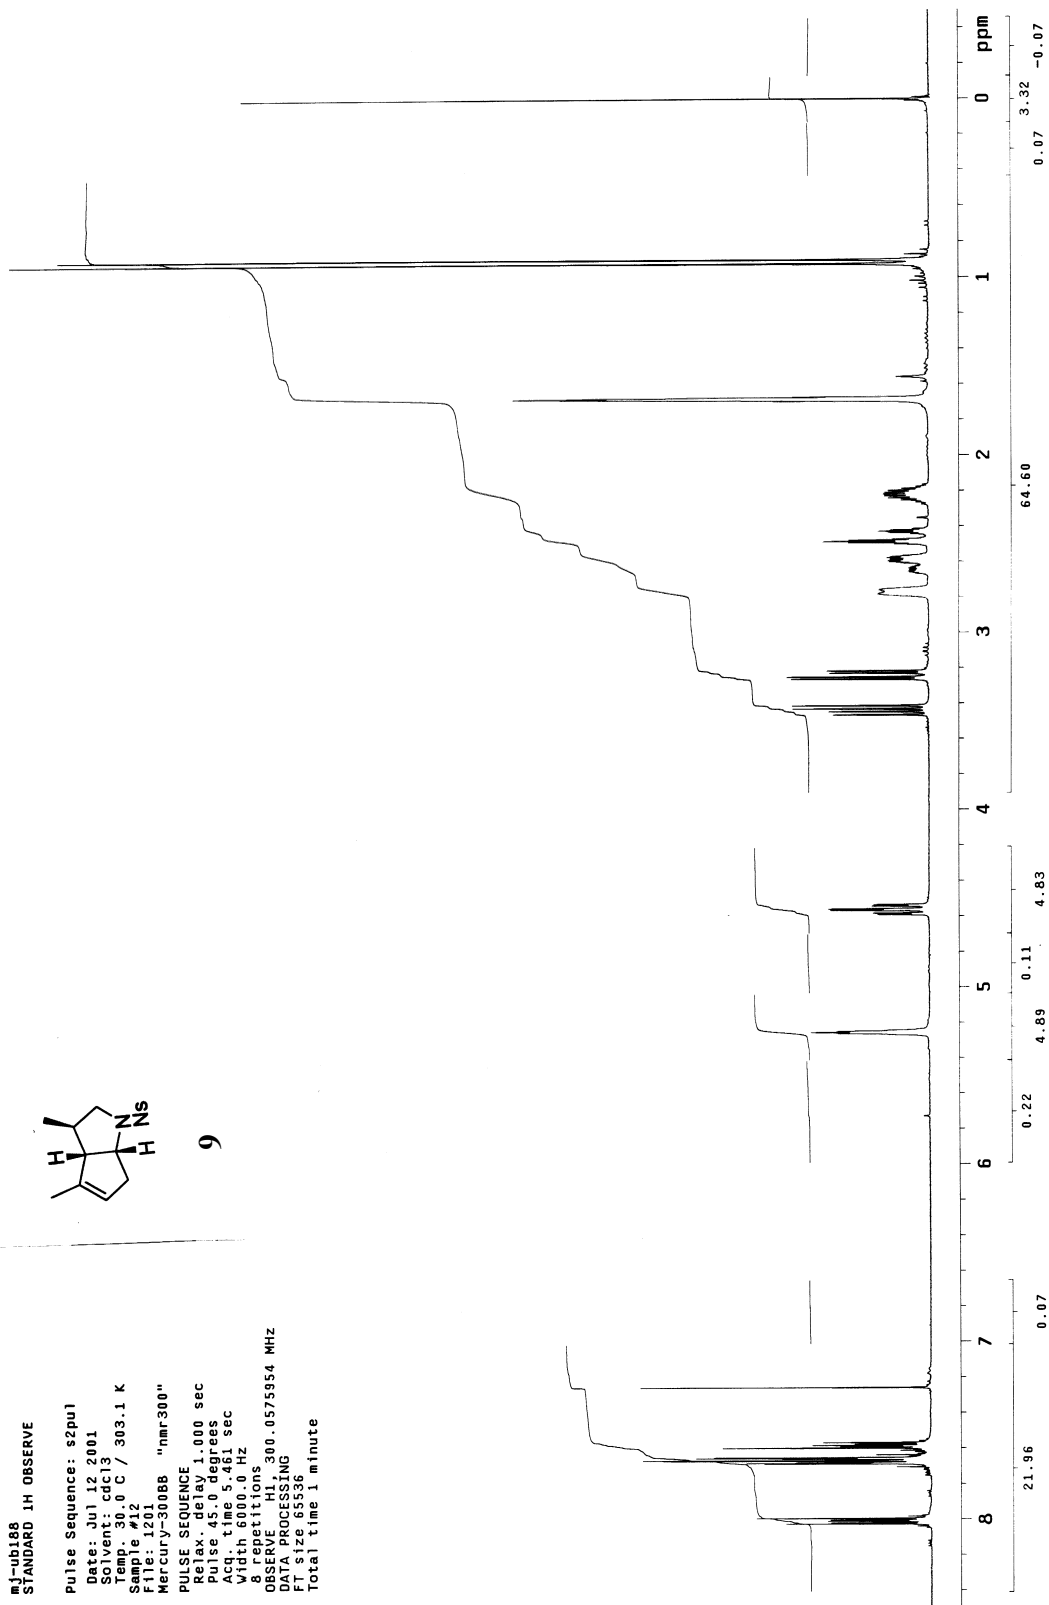

mj-ub188  
13C OBSERVE

Pulse Sequence: s2pul

Date: Jul 12, 2001  
Solvent: cdcl3  
Temp: 30.0 C / 303.1 K  
Sample #12  
File: 1202  
Mercury-300088 "nmr300"  
PULSE SEQUENCE  
P1: 12.000 sec  
Pulse delay: 1.000 sec  
Pulse: 45.0 degrees  
Acq. time: 1.815 sec  
Width: 17000.0 Hz  
1024 repetitions  
OBSERVE C13, 75.4495427 MHz  
DECOUPLE H1, 300.0590417 MHz  
Power: 39 dB  
continuously on  
transmitted  
DATA PROCESSING  
Line broadening: 1.0 Hz  
FT size: 65536  
Total time: 48 minutes

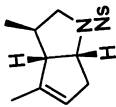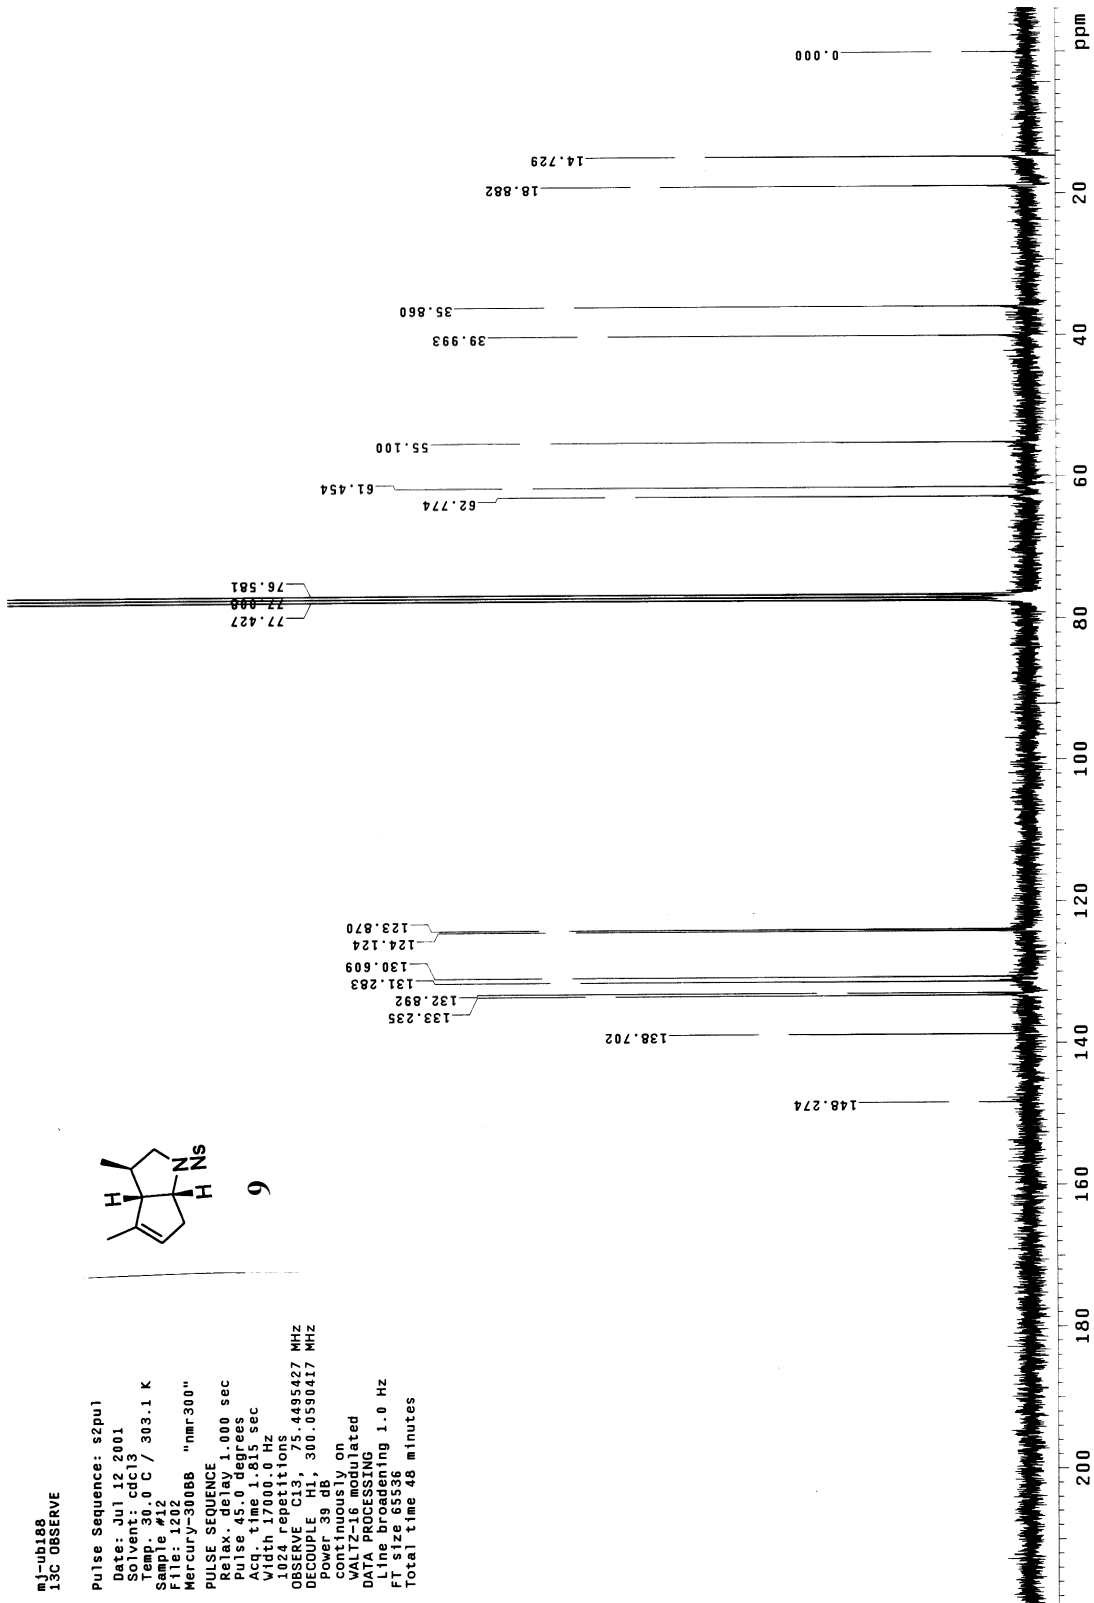

mjb0119b  
STANDARD 1H OBSERVE

Pulse Sequence: s2pu1  
Date: Nov 15 2000  
Solvent: cdcl3  
Temp: 30.0 C / 303.1 K  
Sample #27  
File: 2701  
Mercury-300 "nmr300"  
PULSE SEQUENCE  
Relax. delay 1.000 sec  
Pulse 45.0 degrees  
Acq. time 5.461 sec  
Width 6000.0 Hz  
8 repetitions  
OBSERVE: h1, 300.0575952 MHz  
DATA PROCESSING  
F2: 126536  
Total time 1 minute

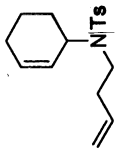

5

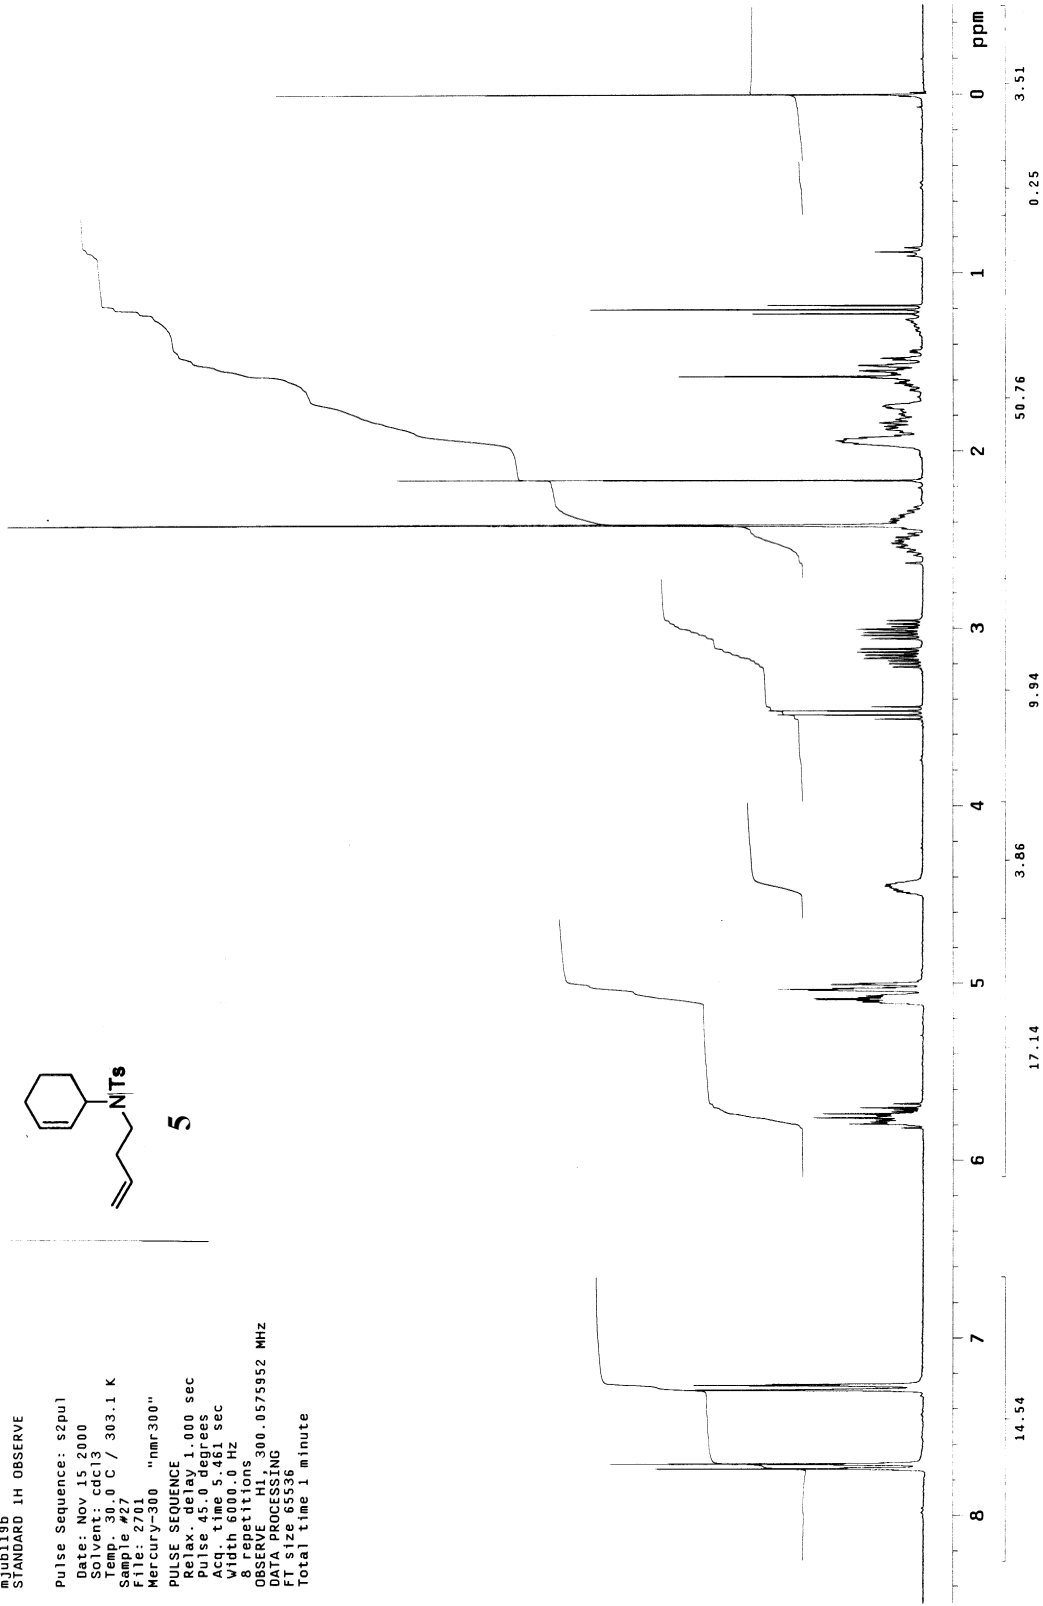

mjub19bcarbon  
13C OBSERVE

Pulse Sequence: s2pul

Date: Nov 16 2000

Solvent: CDCl3

Temp: 30.0 C / 303.1 K

Sample #: 5

File: 501

Mercury-300 "nmr-300"

PULSE SEQUENCE

DELTA 1.000 sec

Pulse 45.0 degrees

Acq. time 1.815 sec

Width 17000.0 Hz

256 repetitions

OBSERVE C13, 75.4495244 MHz

DECOUPLE H1, 300.0590417 MHz

Power 39 dB

continuously on

transmitted

DATA PROCESSING

Line broadening 1.0 Hz

FT size 65536

Total time 12 minutes

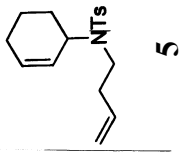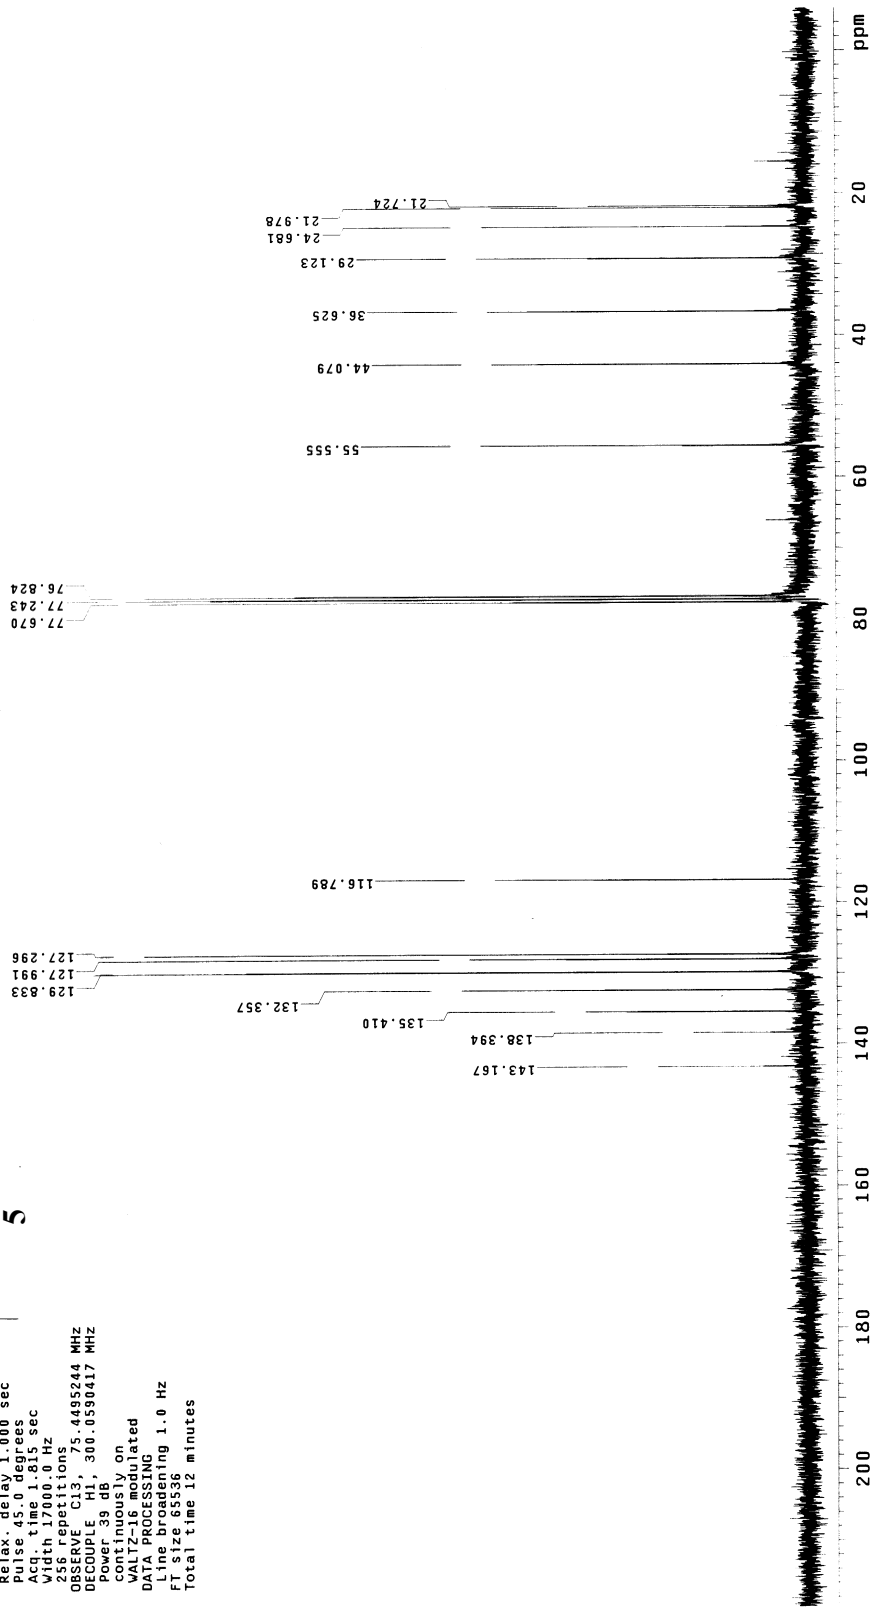

11JUB115  
STANDARD 1H OBSERVE

Pulse Sequence: s2pu1  
Date: Nov 10 2000  
Solvent: cdcl3  
Temp: 30.0 C / 303.1 K  
Sample #18  
File: 1801  
Mercury-300 "nmr300"  
PULSE SEQUENCE  
Relax. delay 1.000 sec  
Pulse 45.0 degrees  
Acq. time 5.461 sec  
Width 6000.0 Hz  
128 repetitions  
OBSERVE H1, 300.0575954 MHz  
DATA PROCESSING  
File size 68532  
Total time 13 minutes

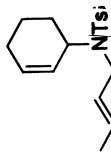

10

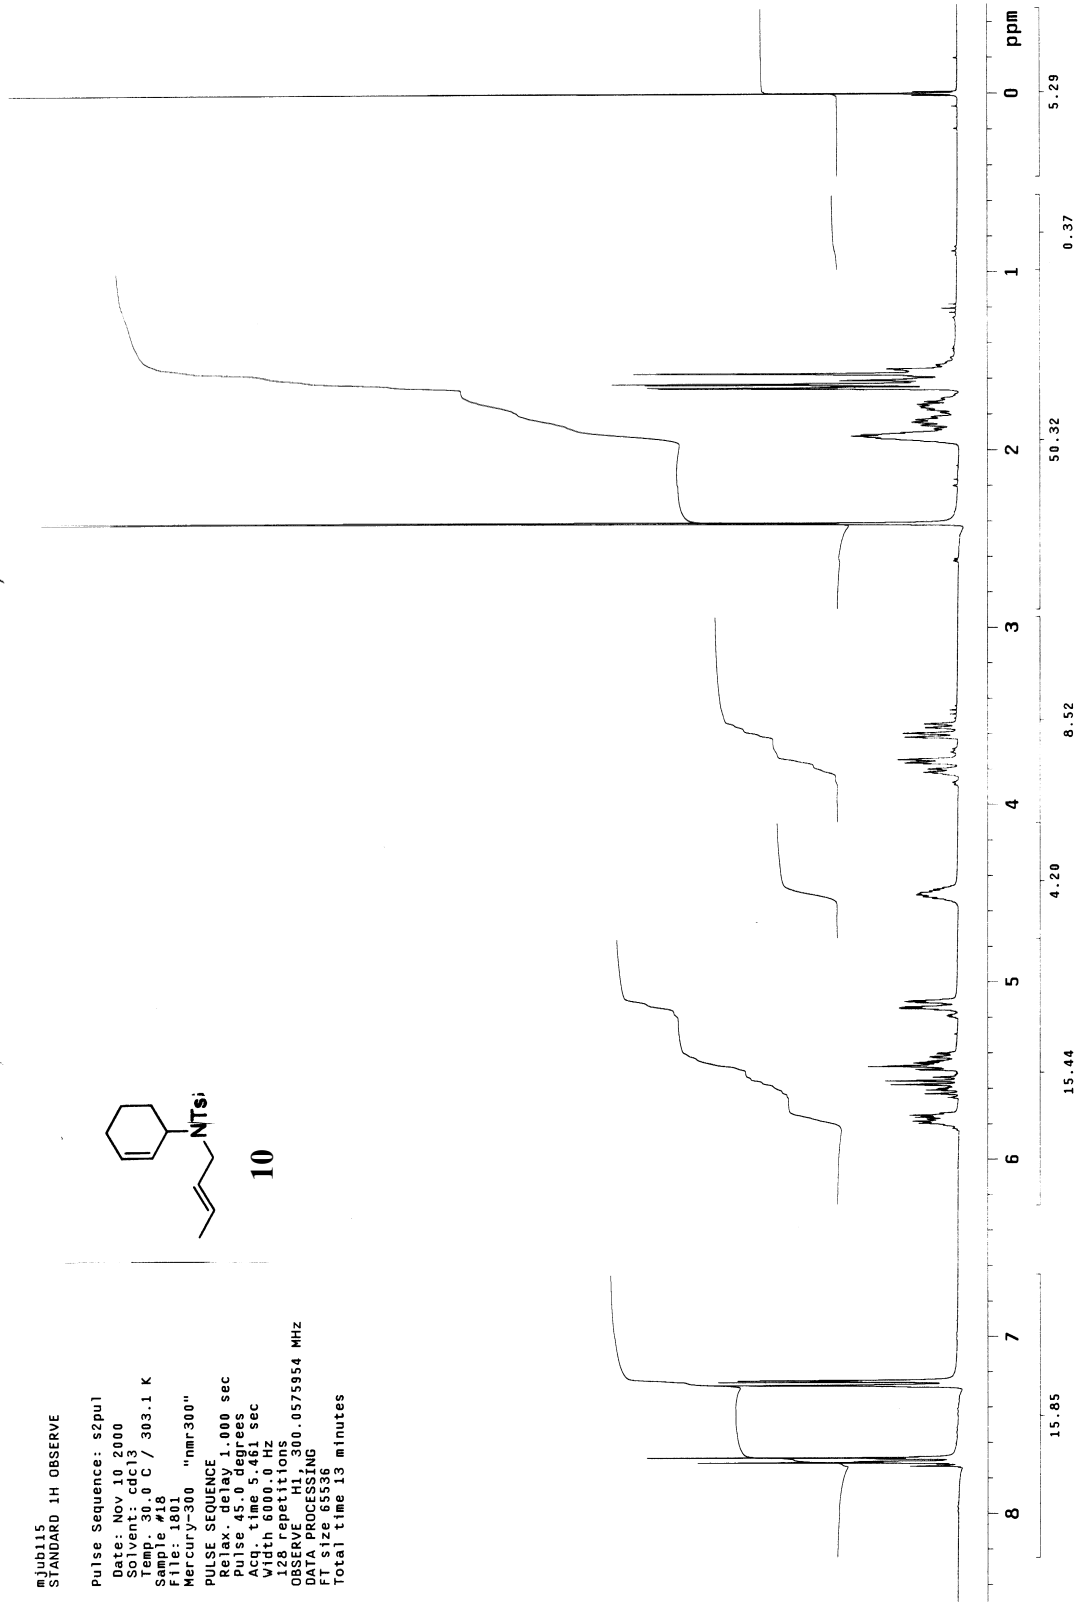

mjub115carbon  
13C OBSERVE

Pulse Sequence: s2pul  
Date: Nov 10 2000  
Solvent: cdCl3  
Temp: 30.0 C / 303.1 K  
Sample #21  
File: 2101  
Mercury-300 "nmr300"

PULSE SEQUENCE  
Relax. delay 1.000 sec  
Pulse 45.0 degrees  
Acq. time 1.815 sec  
Width 17000.0 Hz  
256 repetitions  
OBSERVE C13, 75.4495244 MHz  
DECOUPLE H1, 300.6590417 MHz  
Contingency on  
WAITZ-16 modulated  
DATA PROCESSING  
Line broadening 1.0 Hz  
FT size 65536  
Total time 12 minutes

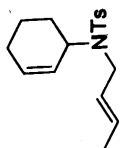

10

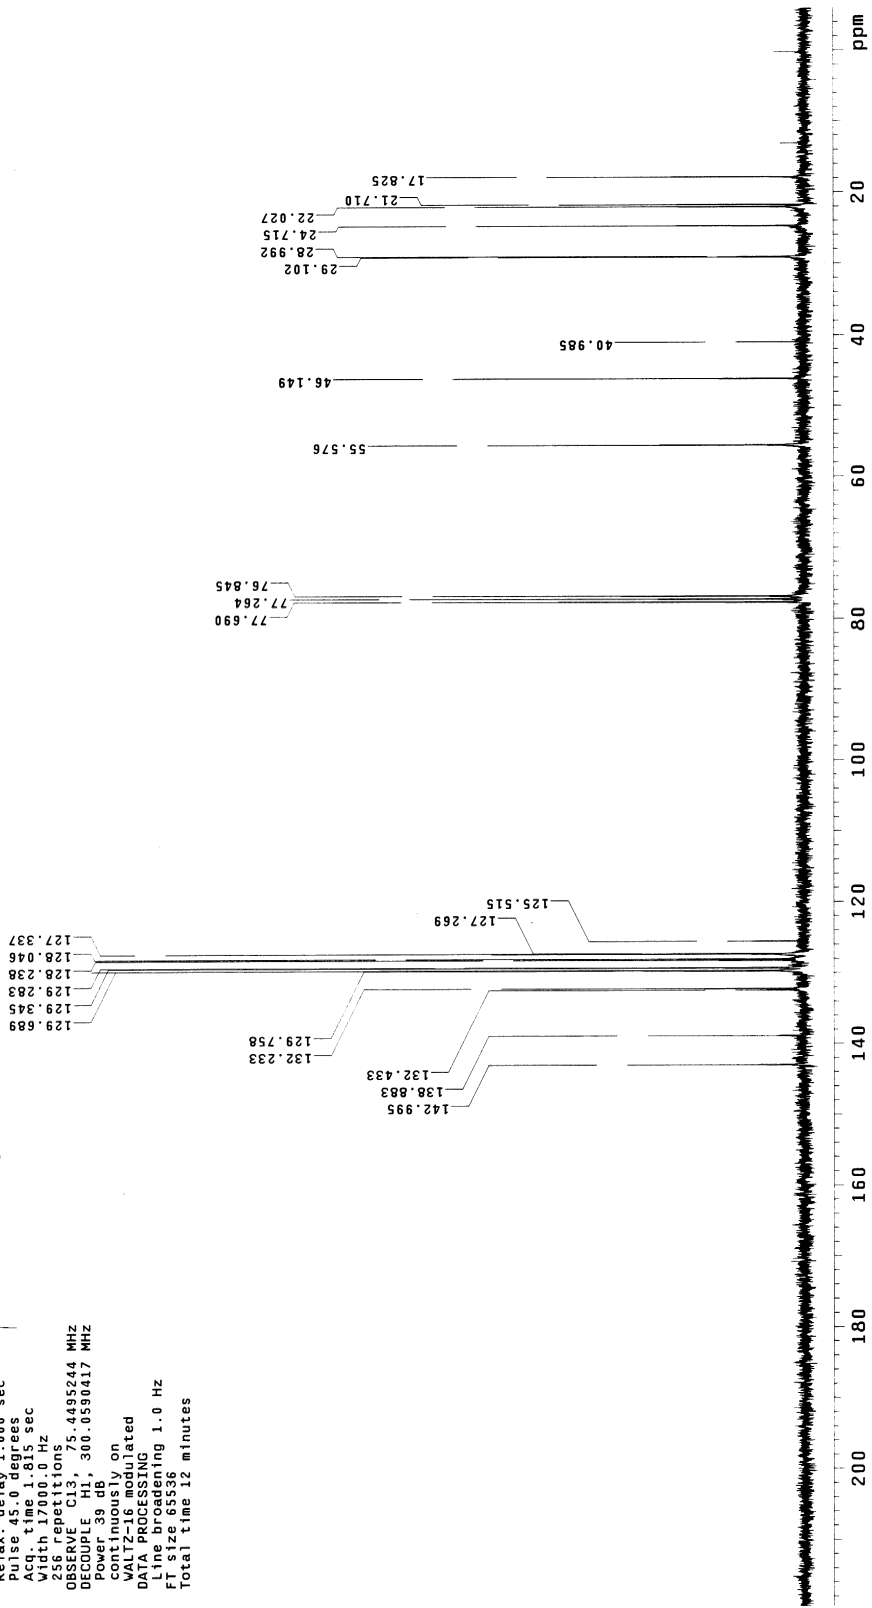

Supplement: b108310d.pdf [file b108310d.pdf]
